# Supplementary material for: A Linear Di-coordinate Boron Radical Cation
Source: Research Square preprint supplement (doi:10.21203/rs.3.rs-1569780/v1), 2022-05-20
Supplement: Supplementary file 1 [file 300410ca715b68062baa0d50.pdf]

# Supporting Information

for

## A Linear Di-coordinate Boron Radical Cation

Yu-Jiang Lin,<sup>‡</sup> Wei-Chun Liu,<sup>‡</sup> Yi-Hung Liu, Gene-Hsiang Lee, Su-Ying Chien and Ching-Wen Chiu\*

Department of Chemistry, National Taiwan University, No. 1, Section 4,  
Roosevelt Road, Taipei 10617, Taiwan

## Content

|                                             |           |
|---------------------------------------------|-----------|
| <b>1. General Consideration .....</b>       | <b>2</b>  |
| <b>2. Synthetic Methods .....</b>           | <b>3</b>  |
| <b>3. Structural Determination.....</b>     | <b>5</b>  |
| <b>4. NMR spectra .....</b>                 | <b>14</b> |
| <b>5. Electrochemical Measurement .....</b> | <b>21</b> |
| <b>6. EPR spectra and simulation .....</b>  | <b>24</b> |
| <b>7. Computational Details.....</b>        | <b>27</b> |
| <b>8. Reference .....</b>                   | <b>52</b> |

## 1. General Consideration

All the manipulations were carried out under nitrogen atmosphere by using standard Schlenk-line techniques or in a glove-box. Toluene, hexane and dichloromethane were purified by with a molecular sieves packed solvent purification system. Pentane and diethyl ether were distilled from Na/K-benzophenone ketyl under nitrogen. Cobaltocene ( $\text{CoCp}_2$ ), lithium diisopropylamide (LDA), tetrakis(dimethylamino)ethylene (TDAE), 4-dimethylaminopyridine (DMAP) and 2,6-dimethylphenylisocyanide (CNXyl) were purchased and used without further purification. Cyclic (alkyl)(amino)carbene (CAAC), 2,2,6,6-tetramethylpiperidine boron dichloride (TMP- $\text{BCl}_2$ ), potassium tetrakis(pentafluorophenyl) borate ( $\text{K}[\text{B}(\text{C}_6\text{F}_5)_4]$ ) were synthesized according to literature procedures.<sup>1-3</sup> NMR spectrums were recorded using Bruker Avance III -400 ( $^1\text{H}$ : 400.2 MHz,  $^{11}\text{B}$ : 128.4 MHz,  $^{13}\text{C}$ : 100.6 MHz,  $^{19}\text{F}$ : 376 MHz). Chemical Shifts ( $\delta$ ) are given in ppm and are referenced to the signals of the residual solvents ( $^1\text{H}$ ,  $^{13}\text{C}$ ) or external  $\text{BF}_3\cdot\text{OEt}_2$  ( $^{11}\text{B}$ ). Elemental analysis were performed on a Heraeus vario III -NCH elemental analyzer.

## 2. Synthetic Methods

### Synthesis of [1][OTf]

CAAC (4.00 g, 8.38 mmol) generated from the corresponding iminium salt was slowly added into a  $\text{TMPBCl}_2$  (1.85 g, 8.38 mmol) hexane solution at  $-78\text{ }^\circ\text{C}$ . The resulting solution was then slowly warmed to room temperature and stirred for another 16 hours. After the reaction, all volatiles were removed under vacuum and the solid residue was washed by 10 mL of pentane for two times before the addition of 20 mL of dichloromethane. The DCM solution was then filtered and the filtrate was dried to afford [1][OTf] as white powder (4.66 g, 84 %). X-ray quality crystals were obtained by layering a DCM solution of [1][OTf] with pentane.  $^1\text{H}$  NMR (400.2 MHz,  $\text{CD}_2\text{Cl}_2$ , ppm):  $\delta$  7.53 (t, 1H, *para*-Dipp), 7.39 (d, 2H, *meta*-Dipp), 2.78 (sept, 2H,  $\text{CH}(\text{CH}_3)_2$ ), 2.46 (s, 2H,  $\text{CH}_2$ ), 2.20-1.5 (m, 16H,  $\text{H}_2\text{C}_{\text{Cy,TMP}}$ ), 1.63 (s, 6H,  $\text{C}(\text{CH}_3)_2$ ), 1.54 (br. s, 6H,  $\text{NC}(\text{CH}_3)_2$ ), 1.40 (d, 6H,  $\text{CH}(\text{CH}_3)_2$ ), 1.29 (d, 6H,  $\text{CH}(\text{CH}_3)_2$ ), 1.12 (br. s, 6H,  $\text{NC}(\text{CH}_3)_2$ ).  $^{11}\text{B}$  NMR (128.4 MHz,  $\text{CD}_2\text{Cl}_2$ , ppm):  $\delta$  33.1.  $^{13}\text{C}\{^1\text{H}\}$  NMR (100.6 MHz,  $\text{CD}_2\text{Cl}_2$ , ppm):  $\delta$  145.7, 132.3, 131.9, 127.1, 85.3, 62.0, 59.6, 44.0, 40.0, 39.1, 33.3, 33.1, 32.0, 29.4, 28.9, 27.1, 25.8, 24.5, 22.6, 14.9. Anal. Calcd. for  $\text{C}_{33}\text{H}_{53}\text{BClF}_3\text{N}_2\text{O}_3\text{S}$ : C, 59.95; H, 8.08; N, 4.24. Found: C, 59.98; H, 8.02; N, 4.09.  $E_{1/2} = -1.18\text{ V}$ , peak different 502 mV.

### Synthesis of 2\*

In a solution  $\text{CoCp}_2$  (1.00 g, 5.29 mmol) in toluene (20 mL), [1][OTf] (3.61 g, 5.29 mmol) were added in one portion. After addition, the reaction mixture was stirred over-night, and the solvent was removed in *vacuo*. The product was extracted by 10 mL of pentane to give 2\* as reddish powder (1.98 g, 73%). Single crystals were obtained by slow evaporation of a benzene solution of 2\* at room temperature. Anal. Calcd for  $\text{C}_{32}\text{H}_{53}\text{BClN}_2$ : C, 75.06; H, 10.43; N, 5.47. Found: C 75.47; H 10.04; N 5.45.  $E_{1/2} = -1.15\text{ V}$ , peak different 430 mV.

### Synthesis of [3][B(C<sub>6</sub>F<sub>5</sub>)<sub>4</sub>]

An equimolar amount of 2\* (1.00 g, 1.95 mmol) and  $\text{KB}(\text{C}_6\text{F}_5)_4$  was allowed to react in 30 mL of DCM at room temperature for 3 hours. Afterwards, all insoluble solids were removed by filtration and the filtrate was dried in *vacuo*. The solid residue was then washed with 10 mL of pentane to afford [3][B(C<sub>6</sub>F<sub>5</sub>)<sub>4</sub>] as yellow powder (2.09 g, 93%). X-ray quality crystals were obtained from layering a DCM solution of [3][B(C<sub>6</sub>F<sub>5</sub>)<sub>4</sub>] with pentane at  $-40\text{ }^\circ\text{C}$ . Anal. Calcd for  $\text{C}_{56}\text{H}_{53}\text{B}_2\text{F}_{20}\text{N}_2$ : C, 58.20; H, 4.62; N, 2.42. Found: C, 58.49; H, 4.51; N, 2.31.  $E_{1/2} = -1.00\text{ V}$ , peak different 270 mV.

### Synthesis of 4

An equimolar amount of [3][B(C<sub>6</sub>F<sub>5</sub>)<sub>4</sub>] (50.0 mg, 0.043 mmol) and TDAE was mixed in 2 mL of *o*-difluorobenzene. The reaction mixture was stirred for 1 hour before the removal of solvent in *vacuo*. Compound 4 was extracted from the solid residue with 3 mL of hexane and obtained as yellow powder (18.4 mg, 88.5 %).  $^1\text{H}$  NMR (400.2 MHz,  $\text{C}_6\text{D}_6$ , ppm):  $\delta$  7.15-7.10 (m, 3H, *Dipp*), 3.71 (sept, 2H,  $\text{CH}(\text{CH}_3)_2$ ), 2.33 (m, 2H,  $\text{H}_2\text{C}_{\text{Cy}}$ ), 1.94 (s, 2H,  $\text{CH}_2$ ), 1.80-1.40 (m, 10H,  $\text{H}_2\text{C}_{\text{Cy,TMP}}$ ), 1.38 (s, 6H,  $\text{C}(\text{CH}_3)_2$ ), 1.37 (d, 6H,  $\text{CH}(\text{CH}_3)_2$ ), 1.31 (d, 6H,  $\text{CH}(\text{CH}_3)_2$ ), 1.24 (br. s, 6H,  $\text{NC}(\text{CH}_3)_2$ ), 1.15 (br. s, 6H,  $\text{NC}(\text{CH}_3)_2$ ).  $^{11}\text{B}$  NMR (128.4 MHz,  $\text{C}_6\text{D}_6$ , ppm):  $\delta$  71.8.  $^{13}\text{C}\{^1\text{H}\}$  NMR (100.6 MHz,  $\text{C}_6\text{D}_6$ , ppm):  $\delta$  151.7, 142.5, 126.5, 123.9, 63.8, 55.7, 53.2, 47.5, 44.4, 38.3, 35.3, 31.5, 27.8, 27.5, 26.9, 26.3, 25.9, 25.5, 17.2.

### Synthesis of [6][B(C<sub>6</sub>F<sub>5</sub>)<sub>4</sub>]

DCM (10 mL) was added to the mixture consisting of [3][B(C<sub>6</sub>F<sub>5</sub>)<sub>4</sub>] (50 mg, 0.043 mmol) and DMAP (5.5 mg, 0.043 mmol) at ambient temperature. After stirring for 1 hour, solvent was removed with vacuum and the solid residue was washed by 10 mL of pentane to afford [6][B(C<sub>6</sub>F<sub>5</sub>)<sub>4</sub>] as violet powder, which was further purified with re-crystallization from DCM/pentane solution (68% yield). Single crystals suitable for X-ray diffraction analysis were obtained from layering a DCM solution of [6][B(C<sub>6</sub>F<sub>5</sub>)<sub>4</sub>] with pentane at -40°C. Anal. Calcd for C<sub>63</sub>H<sub>63</sub>B<sub>2</sub>F<sub>20</sub>N<sub>4</sub>: C, 59.22; H, 4.97; N, 4.38. Found: C, 58.91; H, 4.95; N, 4.05.

### Synthesis of 7

DCM (0.5 mL) was added to the J-Young's NMR tube consisting of 2\* (17.7 mg, 0.035 mmol) and [3][B(C<sub>6</sub>F<sub>5</sub>)<sub>4</sub>] (40.0 mg, 0.035 mmol) at ambient temperature. The solution was de-gassed with three freeze-pump-thaw cycles. Then, the NMR tube was then connected through a tygon tubing to a CO-filled 100 mL Schlenk flask at ambient pressure. After the exposure to CO atmosphere for 18 hours, all volatiles were removed in *vacuo*. 7 was obtained from the reaction mixture by hexane extraction and isolated as reddish powder. <sup>1</sup>H NMR (400.2 MHz, CD<sub>2</sub>Cl<sub>2</sub>, ppm): δ 7.36 (t, 1H, *para*-Dipp), 7.22 (d, 2H, *meta*-Dipp), 2.96 (sept, 2H, CH(CH<sub>3</sub>)<sub>2</sub>), 2.71 (m, 2H, H<sub>2</sub>C<sub>Cy</sub>), 2.10 (s, 2H, CH<sub>2</sub>), 1.90-1.60 (m, 8H, H<sub>2</sub>C<sub>Cy</sub>), 1.50-1.40 (m, 6H, H<sub>2</sub>C<sub>TMP</sub>), 1.31 (s, 6H, C(CH<sub>3</sub>)<sub>2</sub>), 1.30 (d, 6H, CH(CH<sub>3</sub>)<sub>2</sub>), 1.25 (d, 6H, CH(CH<sub>3</sub>)<sub>2</sub>), 1.21 (br. s, 6H, NC(CH<sub>3</sub>)<sub>2</sub>), 1.00 (br. s, 6H, NC(CH<sub>3</sub>)<sub>2</sub>). <sup>11</sup>B NMR (128.4 MHz, CD<sub>2</sub>Cl<sub>2</sub>, ppm): δ -5.6. <sup>13</sup>C {<sup>1</sup>H} NMR (100.6 MHz, C<sub>6</sub>D<sub>6</sub>, ppm): δ 229.4 (m, BCO), 202.5 (m, C<sub>CAACB</sub>), 149.8, 134.3, 130.2, 126.0, 67.6, 55.4, 54.0, 48.2, 42.7, 37.7, 36.2, 32.21, 30.76, 28.2, 28.1, 27.2, 26.3, 25.2, 23.6, 19.0.

### Synthesis of [9][B(C<sub>6</sub>F<sub>5</sub>)<sub>4</sub>]

DCM (10 mL) was added to the mixture consisting of [3][B(C<sub>6</sub>F<sub>5</sub>)<sub>4</sub>] (100 mg, 0.086 mmol) and CNXyl (12.5 mg, 0.095 mmol) at ambient temperature. After stirring for 1 hour, the reaction solution was concentrated to about 2 mL before the addition of 20 mL of pentane. The precipitates were collected and dried to afford [9][B(C<sub>6</sub>F<sub>5</sub>)<sub>4</sub>] as violet powder (91 mg, 81%). X-ray quality crystals were obtained from layering a DCM solution of [9][B(C<sub>6</sub>F<sub>5</sub>)<sub>4</sub>] with hexane at -40 °C. Anal. Calcd for C<sub>65</sub>H<sub>62</sub>B<sub>2</sub>F<sub>20</sub>N<sub>3</sub>•0.5CH<sub>2</sub>Cl<sub>2</sub>: C, 59.18; H, 4.78; N, 3.16. Found: C, 59.18; H, 4.80; N, 3.07.

### 3. Structural Determination

Diffraction data were collected at  $T = 150$  or  $200$  K with a Bruker AXS PEX CCD diffractometer equipped with a rotation anode using graphite-monochromated Mo K  $\alpha$  radiation ( $\lambda = 0.71073$  Å). The structures were solved by the direct method and refined by least-squares cycles. The non-hydrogen atoms were refined anisotropically. Crystallographic data of **2**<sup>\*</sup>, [**3**][B(C<sub>6</sub>F<sub>5</sub>)<sub>4</sub>], [**6**][B(C<sub>6</sub>F<sub>5</sub>)<sub>4</sub>], and [**9**][B(C<sub>6</sub>F<sub>5</sub>)<sub>4</sub>] were deposited at the Cambridge Crystallographic Data Center with deposition numbers CCDC 2167148, 2167149, 2167150, and 2167151.

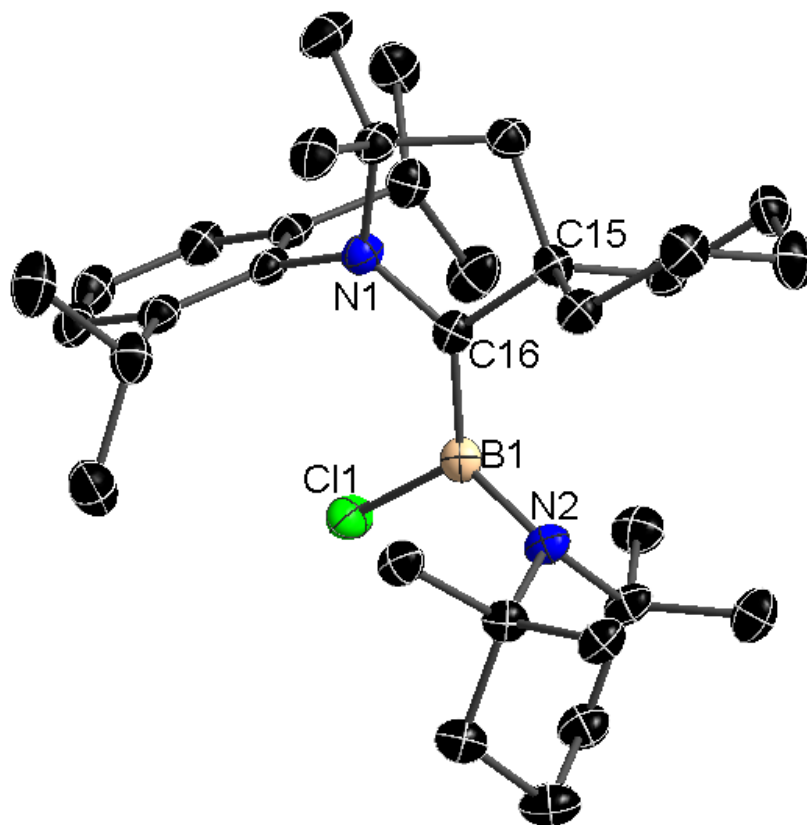

**Figure S1.** Crystal structure of **2**<sup>•</sup>. Hydrogen atoms are omitted for clarity. Thermal ellipsoids are set at 50% probability. Selected bond distances [Å], bond angles [°]: N1-C16 1.376(4), C15-C16 1.550(5), C16-B1 1.522(6), B1-N2 1.463(5), B1-Cl1 1.856(4), N1-C16-C15 107.8(3), N1-C16-B1 128.3(3), C15-C16-B1 123.9(3), C16-B1-Cl1 118.7(3), C16-B1-N2 125.0(3), Cl1-B1-N2 116.2(3).

**Table S1.** Crystal data and experimental details for **2**<sup>•</sup>.

|                                   |                                                     |                  |
|-----------------------------------|-----------------------------------------------------|------------------|
| Empirical formula                 | C <sub>32</sub> H <sub>53</sub> B Cl N <sub>2</sub> |                  |
| Formula weight                    | 512.02                                              |                  |
| Crystal system                    | Monoclinic                                          |                  |
| Space group                       | C2                                                  |                  |
| Unit cell dimensions              | a = 32.6909(10) Å                                   | α = 90°.         |
|                                   | b = 9.4007(2) Å                                     | β = 108.913(3)°. |
|                                   | c = 20.7052(6) Å                                    | γ = 90°.         |
| Volume                            | 6019.5(3) Å <sup>3</sup>                            |                  |
| Z                                 | 8                                                   |                  |
| F(000)                            | 2248                                                |                  |
| Density (calculated)              | 1.130 Mg/m <sup>3</sup>                             |                  |
| Wavelength                        | 0.71073 Å                                           |                  |
| Cell parameters reflections used  | 5715                                                |                  |
| Theta range for Cell parameters   | 3.6660 to 27.5430°.                                 |                  |
| Absorption coefficient            | 0.149 mm <sup>-1</sup>                              |                  |
| Temperature                       | 150(2) K                                            |                  |
| Crystal size                      | 0.25 x 0.20 x 0.15 mm <sup>3</sup>                  |                  |
| Diffractometer                    | Xcalibur, Atlas, Gemini                             |                  |
| Absorption correction             | Semi-empirical from equivalents                     |                  |
| Max. and min. transmission        | 1.00000 and 0.71808                                 |                  |
| No. of measured reflections       | 16508                                               |                  |
| No. of independent reflections    | 11547 [R(int) = 0.0357]                             |                  |
| No. of observed [I > 2σ(I)]       | 9186                                                |                  |
| Completeness to theta = 25.242°   | 99.7 %                                              |                  |
| Theta range for data collection   | 3.120 to 27.500°.                                   |                  |
| Final R indices [I > 2σ(I)]       | R1 = 0.0529, wR2 = 0.1075                           |                  |
| R indices (all data)              | R1 = 0.0752, wR2 = 0.1232                           |                  |
| Goodness-of-fit on F <sup>2</sup> | 1.007                                               |                  |
| No. of reflections                | 11547                                               |                  |
| No. of parameters                 | 649                                                 |                  |
| No. of restraints                 | 1                                                   |                  |
| Absolute structure parameter      | 0.00(4)                                             |                  |
| Largest diff. peak and hole       | 0.434 and -0.247 e.Å <sup>-3</sup>                  |                  |

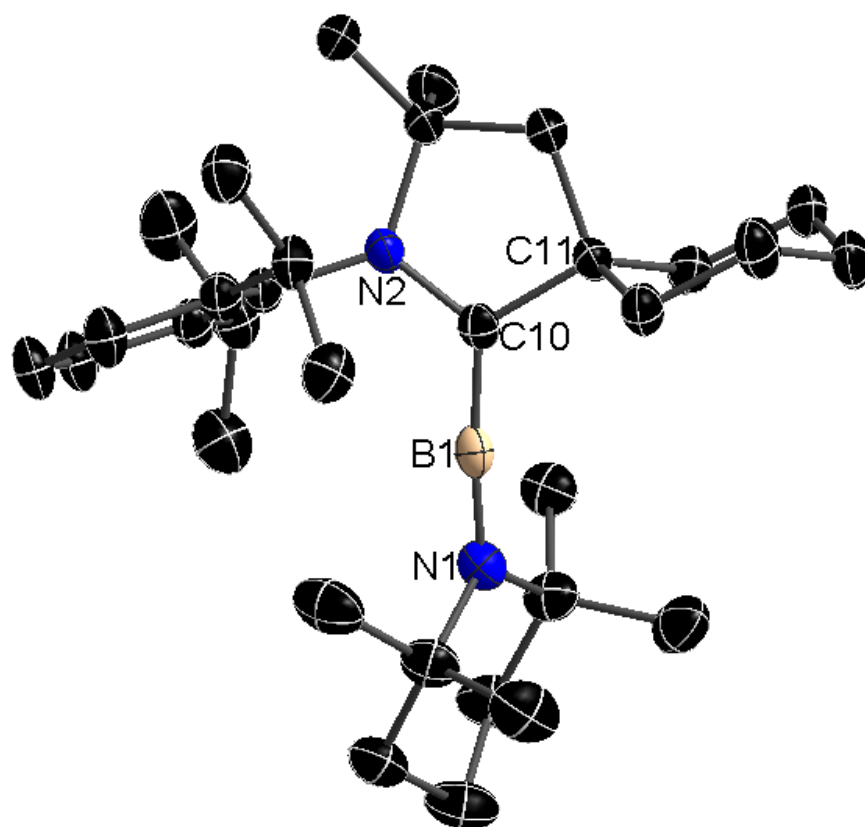

**Figure S2.** Crystal structure drawing of  $[3]^+$ . Hydrogen atoms and counter anion are omitted for clarity. Thermal ellipsoids are set at 50% probability. Selected bond distances [ $\text{\AA}$ ], bond angles [ $^\circ$ ]: N2-C10 1.358(2), C11-C10 1.527(3), C10-B1 1.462(3), C10-B1 1.462(3), B1-N1 1.340(3), C16-B1-N2 173.3(2), N2-C10-C11 110.6(4), N2-C10-B1 124.7(9), C11-C10-B1 124.4(7).

**Table S2.** Crystal data and experimental details for [3][B(C<sub>6</sub>F<sub>5</sub>)<sub>4</sub>].

|                                   |                                                                               |                  |
|-----------------------------------|-------------------------------------------------------------------------------|------------------|
| Empirical formula                 | C <sub>56</sub> H <sub>53</sub> B <sub>2</sub> F <sub>20</sub> N <sub>2</sub> |                  |
| Formula weight                    | 1155.62                                                                       |                  |
| Crystal system                    | Monoclinic                                                                    |                  |
| Space group                       | P2 <sub>1</sub> /c                                                            |                  |
| Unit cell dimensions              | a = 16.8466(4) Å                                                              | α = 90°.         |
|                                   | b = 20.3163(5) Å                                                              | β = 112.548(3)°. |
|                                   | c = 16.5216(4) Å                                                              | γ = 90°.         |
| Volume                            | 5222.4(2) Å <sup>3</sup>                                                      |                  |
| Z                                 | 4                                                                             |                  |
| F(000)                            | 2372                                                                          |                  |
| Density (calculated)              | 1.470 Mg/m <sup>3</sup>                                                       |                  |
| Wavelength                        | 0.71073 Å                                                                     |                  |
| Cell parameters reflections used  | 5548                                                                          |                  |
| Theta range for Cell parameters   | 3.0580 to 27.0090°.                                                           |                  |
| Absorption coefficient            | 0.135 mm <sup>-1</sup>                                                        |                  |
| Temperature                       | 150(2) K                                                                      |                  |
| Crystal size                      | 0.25 x 0.20 x 0.15 mm <sup>3</sup>                                            |                  |
| Diffractometer                    | Xcalibur, Atlas, Gemini                                                       |                  |
| Absorption correction             | Semi-empirical from equivalents                                               |                  |
| Max. and min. transmission        | 1.00000 and 0.82028                                                           |                  |
| No. of measured reflections       | 35224                                                                         |                  |
| No. of independent reflections    | 11636 [R(int) = 0.0425]                                                       |                  |
| No. of observed [I > 2σ(I)]       | 7313                                                                          |                  |
| Completeness to theta = 25.242°   | 99.8 %                                                                        |                  |
| Theta range for data collection   | 2.852 to 27.500°.                                                             |                  |
| Final R indices [I > 2σ(I)]       | R1 = 0.0481, wR2 = 0.0929                                                     |                  |
| R indices (all data)              | R1 = 0.0950, wR2 = 0.1130                                                     |                  |
| Goodness-of-fit on F <sup>2</sup> | 1.010                                                                         |                  |
| No. of reflections                | 11636                                                                         |                  |
| No. of parameters                 | 721                                                                           |                  |
| No. of restraints                 | 1                                                                             |                  |
| Largest diff. peak and hole       | 0.316 and -0.260 e.Å <sup>-3</sup>                                            |                  |

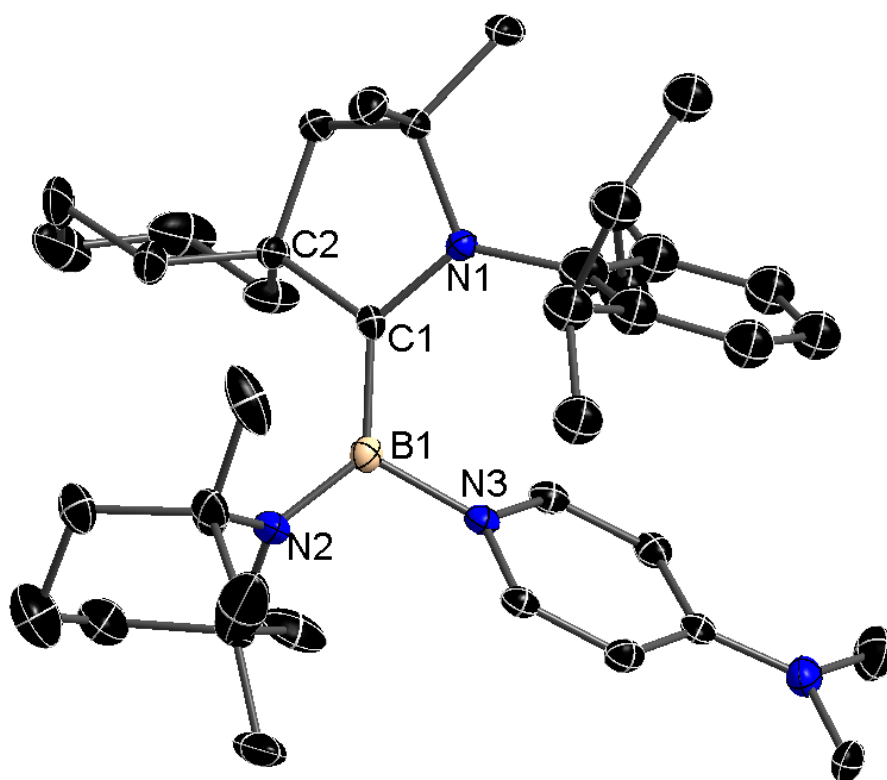

**Figure S3.** Crystal structure of  $[6]^{2+}$ . Hydrogen atoms and counter anion are omitted for clarity. Thermal ellipsoids are set at 50% probability. Selected bond distances [ $\text{\AA}$ ], bond angles [ $^\circ$ ]: C2-C1 1.559(5), N1-C1 1.389(4), C1-B1 1.545(5), B1-N2 1.447(5), B1-N3 1.551(5), C2-C1-N1 106.1(3), C2-C1-B1 124.6(3), N1-C1-B1 129.1(3), C1-B1-N2 130.9(3), C1-B1-N3 114.9(3), N2-B1-N3 114.2(3).

**Table S3.** Crystal data and structure refinement for [6][B(C<sub>6</sub>F<sub>5</sub>)<sub>4</sub>].

|                                   |                                                                               |                   |
|-----------------------------------|-------------------------------------------------------------------------------|-------------------|
| Empirical formula                 | C <sub>63</sub> H <sub>63</sub> B <sub>2</sub> F <sub>20</sub> N <sub>4</sub> |                   |
| Formula weight                    | 1277.79                                                                       |                   |
| Temperature                       | 150(2) K                                                                      |                   |
| Wavelength                        | 0.71073 Å                                                                     |                   |
| Crystal system                    | Monoclinic                                                                    |                   |
| Space group                       | P2 <sub>1</sub> /n                                                            |                   |
| Unit cell dimensions              | a = 18.7850(6) Å                                                              | α = 90°.          |
|                                   | b = 16.7762(5) Å                                                              | β = 112.0207(7)°. |
|                                   | c = 20.2902(7) Å                                                              | γ = 90°.          |
| Volume                            | 5927.8(3) Å <sup>3</sup>                                                      |                   |
| Z                                 | 4                                                                             |                   |
| Density (calculated)              | 1.432 Mg/m <sup>3</sup>                                                       |                   |
| Absorption coefficient            | 0.127 mm <sup>-1</sup>                                                        |                   |
| F(000)                            | 2636                                                                          |                   |
| Crystal size                      | 0.234 x 0.222 x 0.025 mm <sup>3</sup>                                         |                   |
| Theta range for data collection   | 2.228 to 27.499°.                                                             |                   |
| Index ranges                      | -24 ≤ h ≤ 22, 0 ≤ k ≤ 21, 0 ≤ l ≤ 26                                          |                   |
| Reflections collected             | 15785                                                                         |                   |
| Independent reflections           | 15785 [R(int) = ?]                                                            |                   |
| Completeness to theta = 25.242°   | 99.9 %                                                                        |                   |
| Absorption correction             | Semi-empirical from equivalents                                               |                   |
| Max. and min. transmission        | 0.9590 and 0.7277                                                             |                   |
| Refinement method                 | Full-matrix least-squares on F <sup>2</sup>                                   |                   |
| Data / restraints / parameters    | 15785 / 2 / 815                                                               |                   |
| Goodness-of-fit on F <sup>2</sup> | 1.117                                                                         |                   |
| Final R indices [I > 2σ(I)]       | R1 = 0.0892, wR2 = 0.1942                                                     |                   |
| R indices (all data)              | R1 = 0.1194, wR2 = 0.2119                                                     |                   |
| Extinction coefficient            | n/a                                                                           |                   |
| Largest diff. peak and hole       | 1.687 and -0.768 e.Å <sup>-3</sup>                                            |                   |

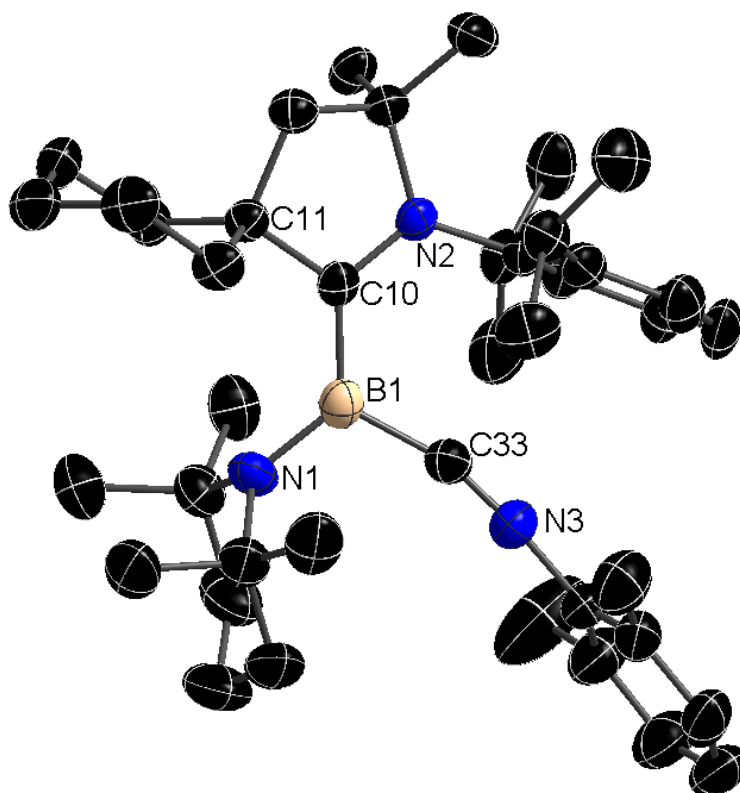

**Figure S4.** Crystal structure of [9]<sup>+</sup>. Hydrogen atoms, solvents, and counter anion are omitted for clarity. Thermal ellipsoids are set at 50% probability. Selected bond distances [Å], bond angles [°]: C11-C10 1.538(4), N2-C10 1.332(4), C10-B1 1.560(5), B1-N1 1.458(5), B1-C33 1.578(5), C33-N3 1.172(5), C11-C10-N2 108.9(3), C11-C10-B1 125.5(3), N2-C10-B1 125.5(3), C10-B1-N1 127.1(3), C10-B1-C33 120.1(3), N1-B1-C33 112.8(3), B1-C33-N3 164.2(4).

**Table S4.** Crystal data and structure refinement for [9][B(C<sub>6</sub>F<sub>5</sub>)<sub>4</sub>].

|                                   |                                                                                                  |                   |
|-----------------------------------|--------------------------------------------------------------------------------------------------|-------------------|
| Empirical formula                 | C <sub>68</sub> H <sub>67</sub> B <sub>2</sub> Cl <sub>1.50</sub> F <sub>20</sub> N <sub>3</sub> |                   |
| Formula weight                    | 1381.04                                                                                          |                   |
| Temperature                       | 200(2) K                                                                                         |                   |
| Wavelength                        | 0.71073 Å                                                                                        |                   |
| Crystal system                    | Triclinic                                                                                        |                   |
| Space group                       | P-1                                                                                              |                   |
| Unit cell dimensions              | a = 11.6594(4) Å                                                                                 | α = 76.3140(10)°. |
|                                   | b = 15.0335(5) Å                                                                                 | β = 79.8800(10)°. |
|                                   | c = 19.7069(7) Å                                                                                 | γ = 89.9970(10)°. |
| Volume                            | 3300.9(2) Å <sup>3</sup>                                                                         |                   |
| Z                                 | 2                                                                                                |                   |
| Density (calculated)              | 1.390 Mg/m <sup>3</sup>                                                                          |                   |
| Absorption coefficient            | 0.178 mm <sup>-1</sup>                                                                           |                   |
| F(000)                            | 1423                                                                                             |                   |
| Crystal size                      | 0.137 x 0.118 x 0.035 mm <sup>3</sup>                                                            |                   |
| Theta range for data collection   | 1.960 to 25.000°.                                                                                |                   |
| Index ranges                      | -13 ≤ h ≤ 13, -16 ≤ k ≤ 17, -23 ≤ l ≤ 23                                                         |                   |
| Reflections collected             | 46884                                                                                            |                   |
| Independent reflections           | 11596 [R(int) = 0.0627]                                                                          |                   |
| Completeness to theta = 25.000°   | 99.9 %                                                                                           |                   |
| Absorption correction             | Semi-empirical from equivalents                                                                  |                   |
| Max. and min. transmission        | 0.9590 and 0.8753                                                                                |                   |
| Refinement method                 | Full-matrix least-squares on F <sup>2</sup>                                                      |                   |
| Data / restraints / parameters    | 11596 / 3 / 875                                                                                  |                   |
| Goodness-of-fit on F <sup>2</sup> | 1.070                                                                                            |                   |
| Final R indices [I > 2σ(I)]       | R1 = 0.0800, wR2 = 0.2370                                                                        |                   |
| R indices (all data)              | R1 = 0.1031, wR2 = 0.2595                                                                        |                   |
| Extinction coefficient            | n/a                                                                                              |                   |
| Largest diff. peak and hole       | 1.137 and -0.521 e.Å <sup>-3</sup>                                                               |                   |

#### 4. NMR spectra

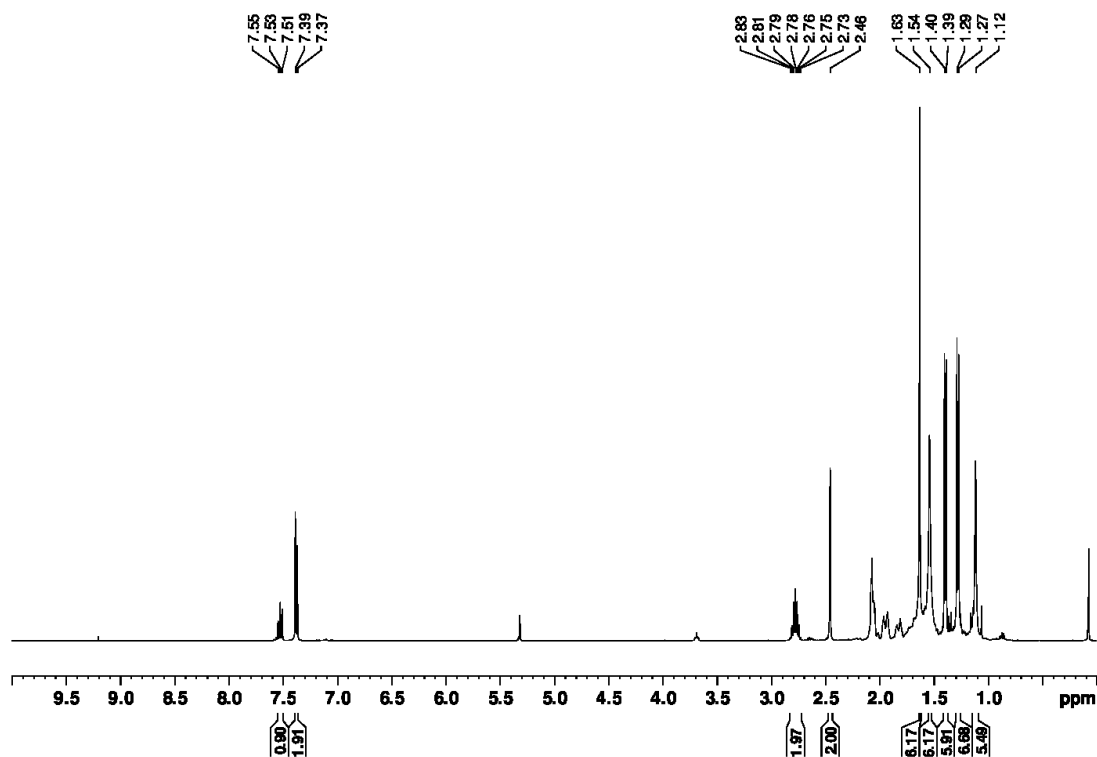

Figure S5. <sup>1</sup>H NMR spectrum of [1][OTf] in CD<sub>2</sub>Cl<sub>2</sub>.

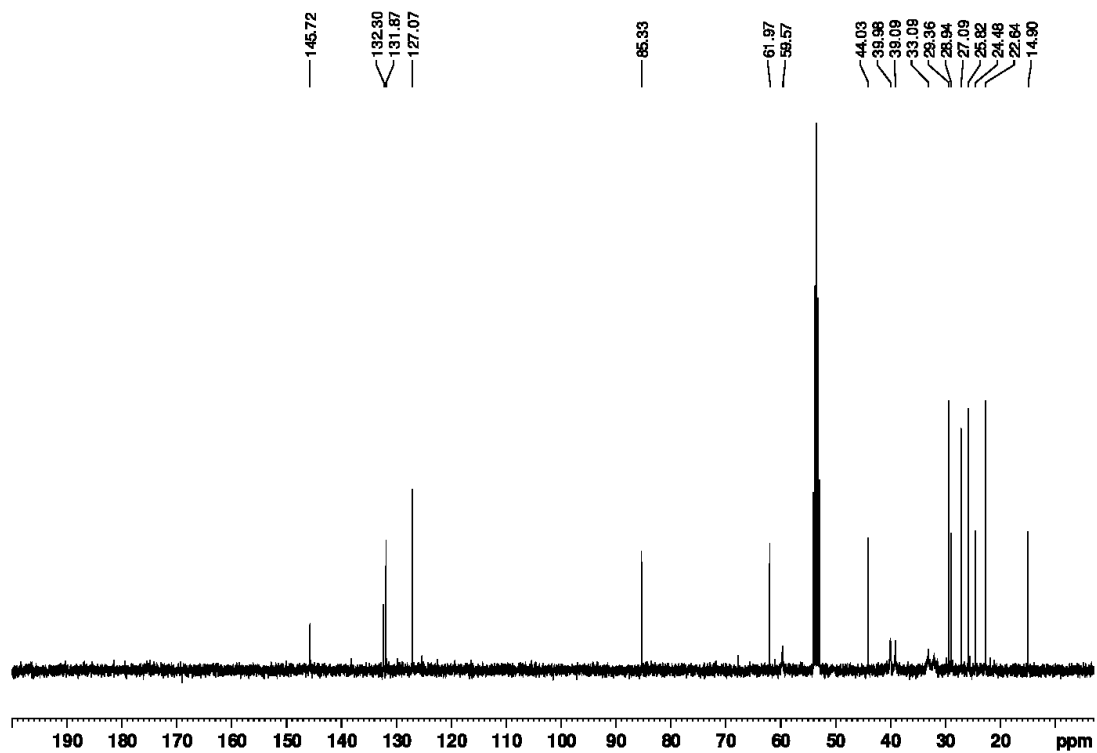

Figure S6. <sup>13</sup>C{<sup>1</sup>H} NMR spectrum of [1][OTf] in CD<sub>2</sub>Cl<sub>2</sub>.

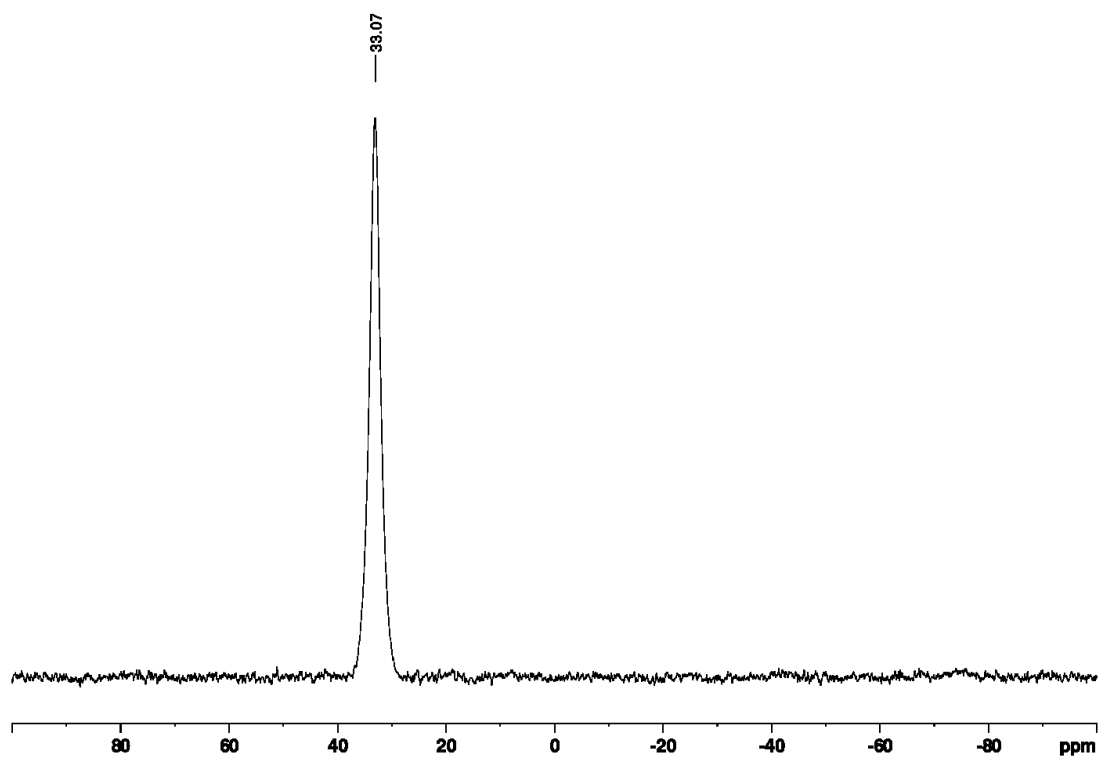

Figure S7.  $^{11}\text{B}$  NMR spectrum of [1][OTf] in  $\text{CD}_2\text{Cl}_2$ .

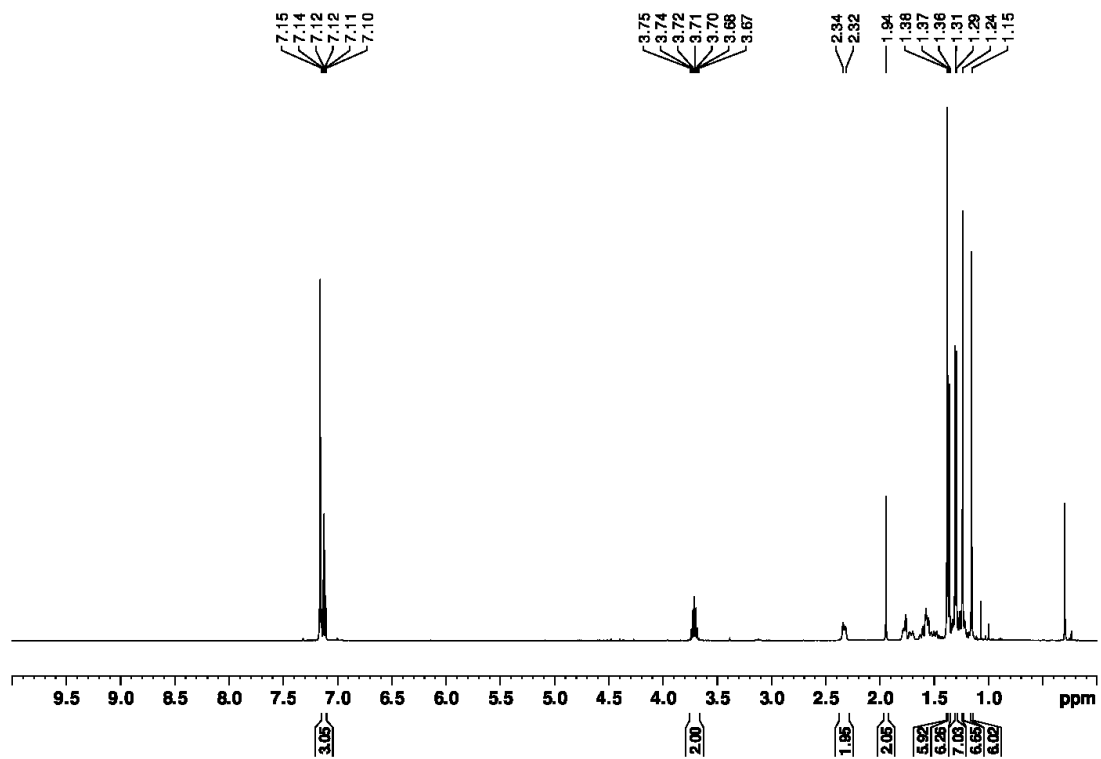

Figure S8.  $^1\text{H}$  NMR spectrum of 4 in  $\text{C}_6\text{D}_6$ .

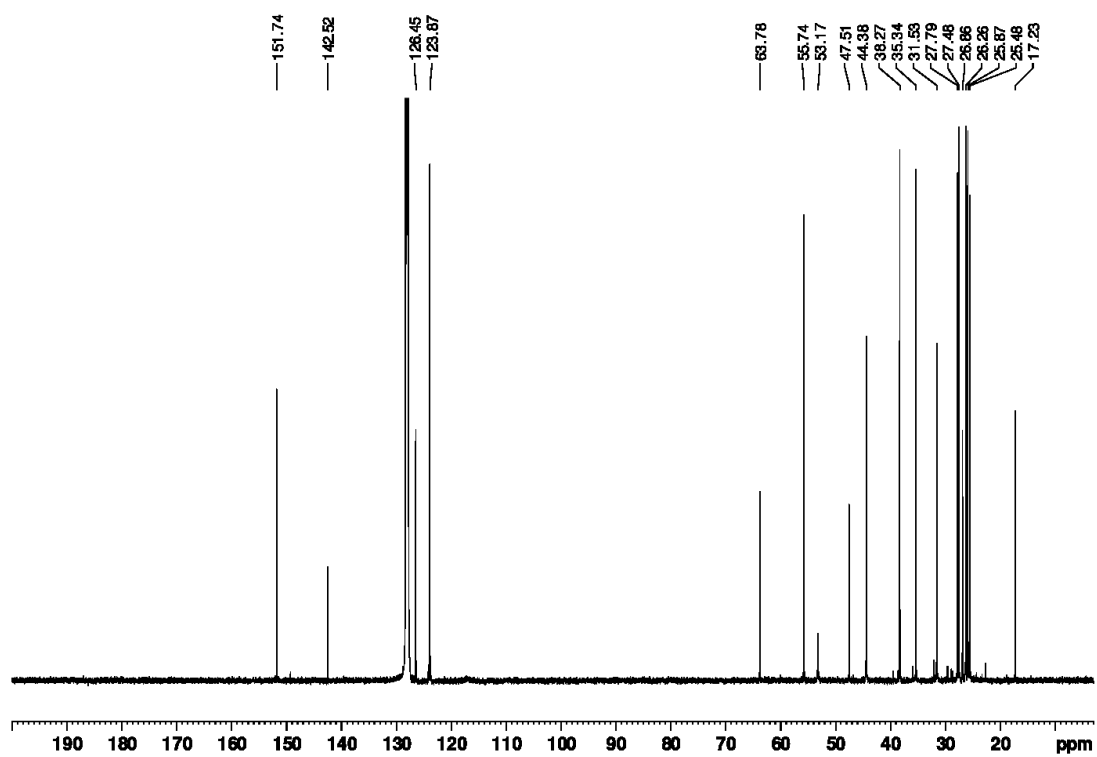

Figure S9.  $^{13}\text{C}\{^1\text{H}\}$  NMR spectrum of **4** in  $\text{C}_6\text{D}_6$ .

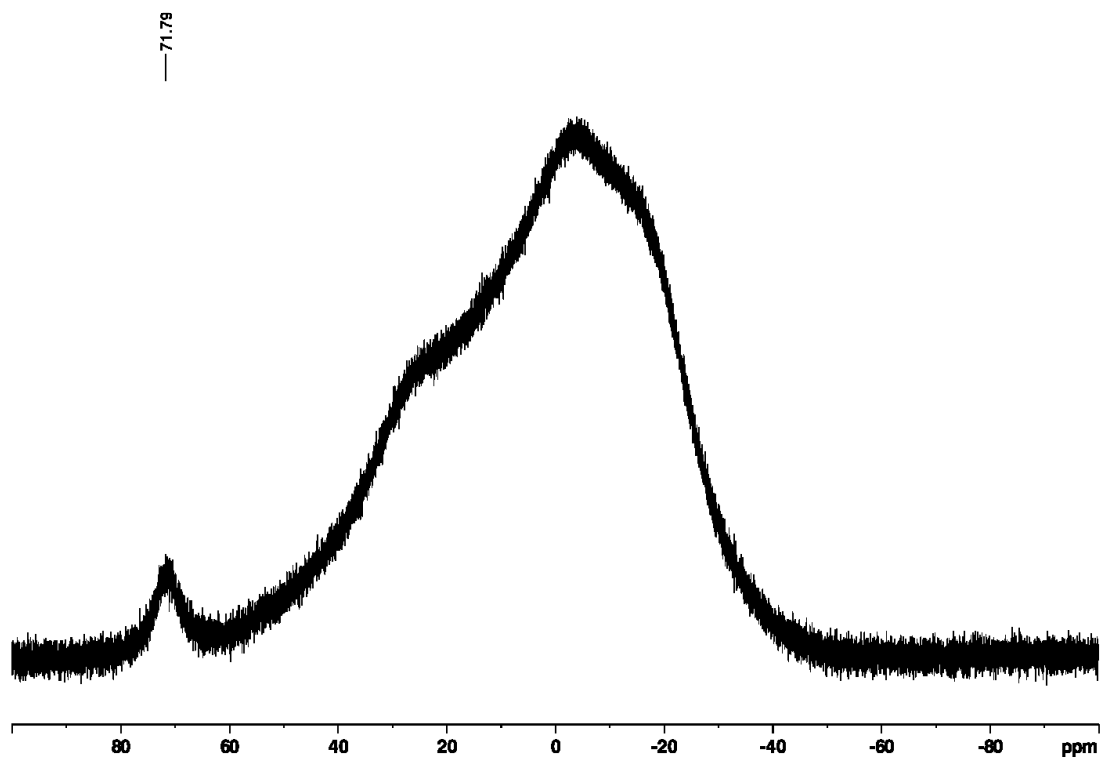

Figure S10.  $^{11}\text{B}$  NMR spectrum of **4** in  $\text{C}_6\text{D}_6$ .

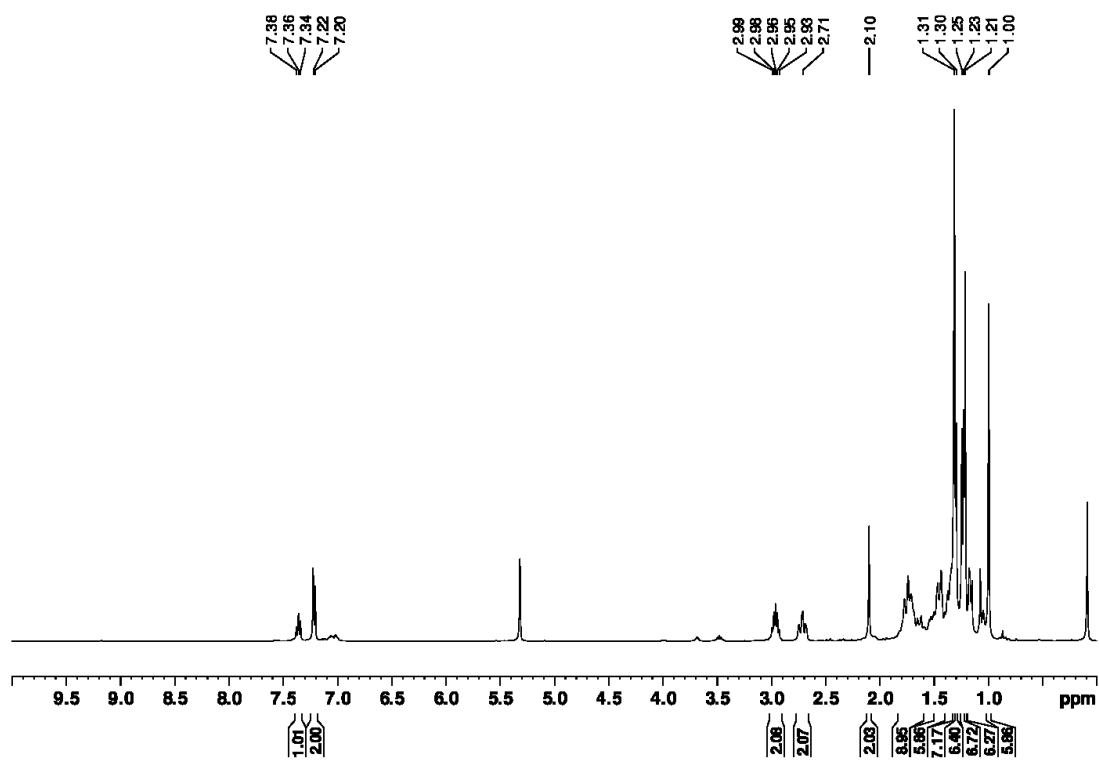

Figure S11.  $^1\text{H}$  NMR spectrum of 7 in  $\text{CD}_2\text{Cl}_2$ .

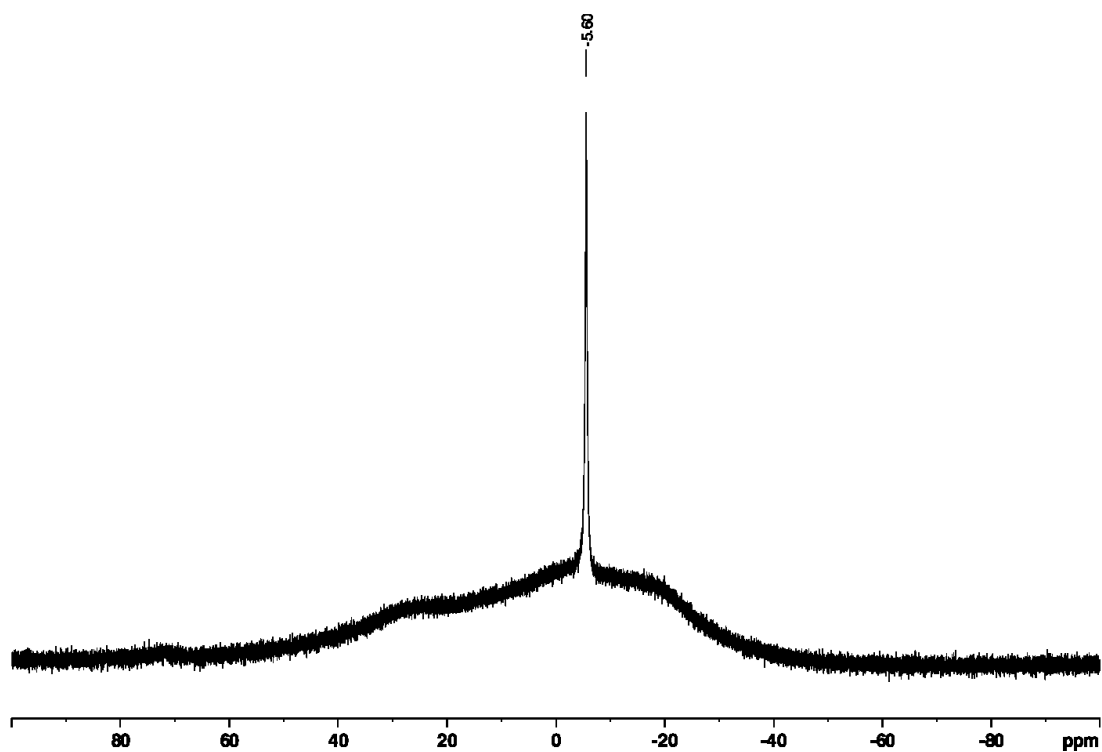

Figure S12.  $^{11}\text{B}$  NMR spectrum of 7 in  $\text{CD}_2\text{Cl}_2$ .

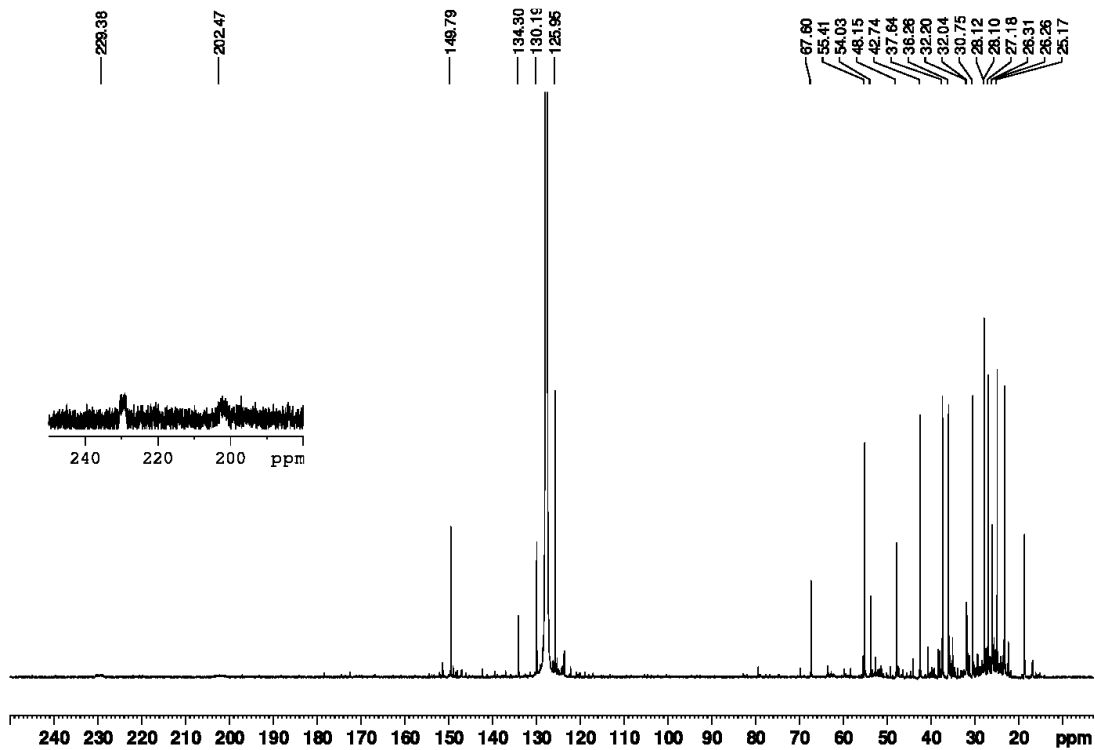

Figure S13.  $^{13}\text{C}\{^1\text{H}\}$  NMR spectrum of **7** in  $\text{C}_6\text{D}_6$ .

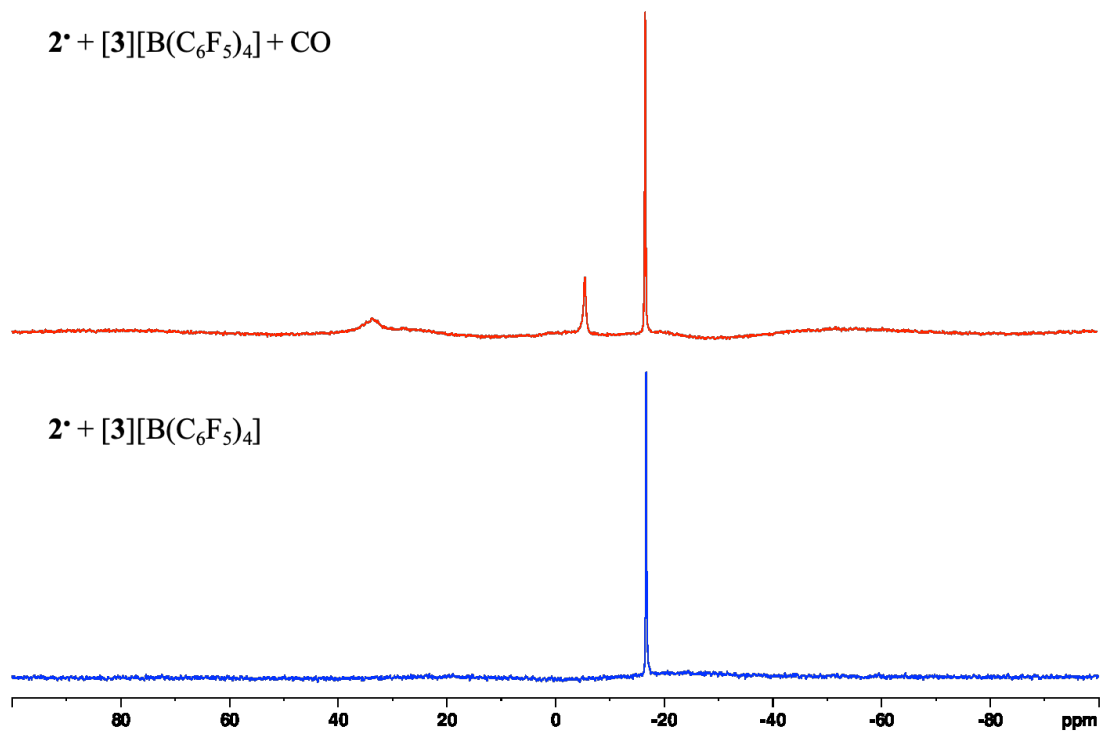

**Figure S14.**  $^{11}\text{B}$  NMR spectrum of an equimolar mixture of  $2^*$  and  $[3][\text{B}(\text{C}_6\text{F}_5)_4]$  in  $\text{CD}_2\text{Cl}_2$  before and after CO exposure.

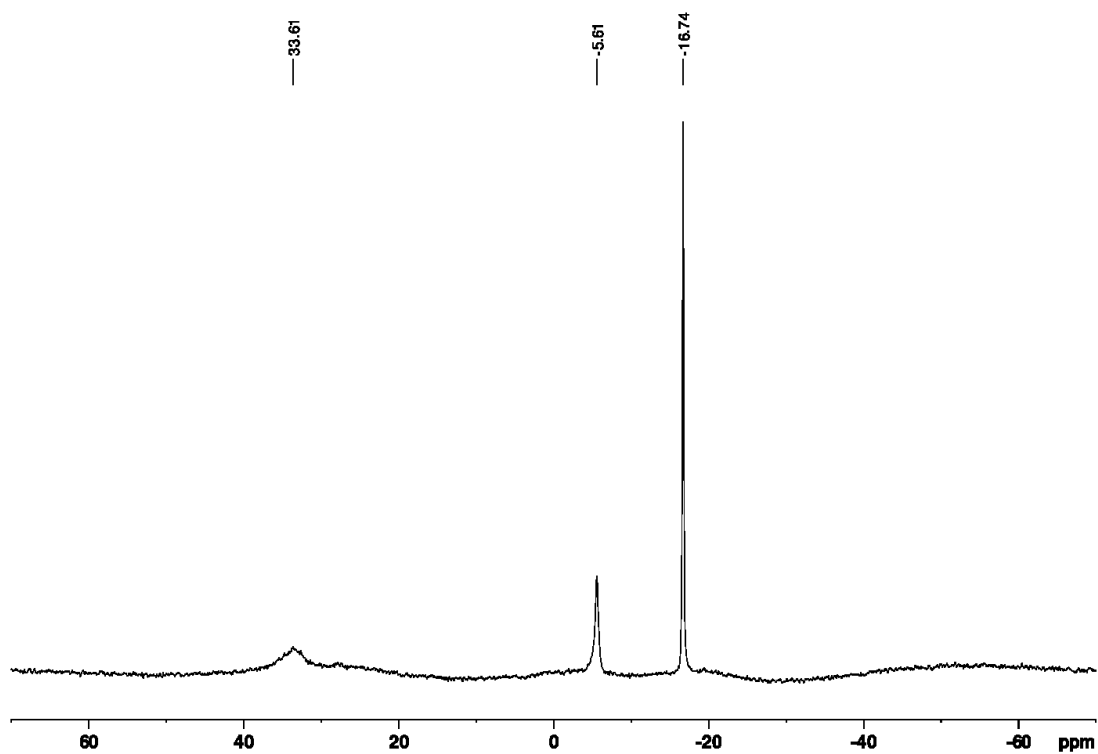

**Figure S15.**  $^{11}\text{B}$  NMR spectrum (in  $\text{CD}_2\text{Cl}_2$ ) of  $[1][\text{B}(\text{C}_6\text{F}_5)_4]$  and **7** obtained from the reaction of  $2^*$  and  $[3][\text{B}(\text{C}_6\text{F}_5)_4]$  with CO.

7 degases overnight

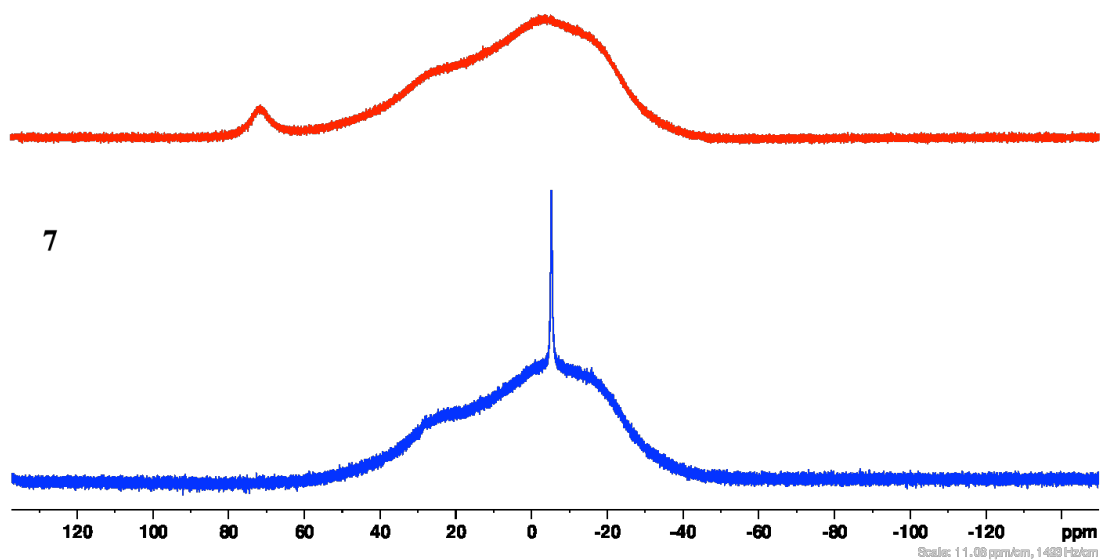

**Figure S16.**  $^{11}\text{B}$  NMR spectrum (in  $\text{C}_6\text{D}_6$ ) of **4** obtained from the removal of CO from **7** under vacuum.

## 5. Electrochemical Measurement

All electrochemical experiments were performed with an electrochemical analyzer from CH Instruments (Model 660 D) at a scan rate of 100 mV/s with a standard 3-electrode system: an Ag/AgNO<sub>3</sub> reference electrode, a glassy carbon working electrode, and a platinum wire auxiliary electrode. Electrode was immersed in a solution (10 mL) containing <sup>n</sup>Bu<sub>4</sub>NPF<sub>6</sub> (0.1 M) and analyte (0.001 M in CH<sub>2</sub>Cl<sub>2</sub>). The supporting electrolyte, *n*-Bu<sub>4</sub>NPF<sub>6</sub>, was dried at 80 °C under vacuum for overnight, and was stored inside a glove box. In all cases, ferrocene was used as an internal standard, and all reduction potentials are reported with respect to the E<sub>1/2</sub> of the Fc/Fc<sup>+</sup> redox couple.

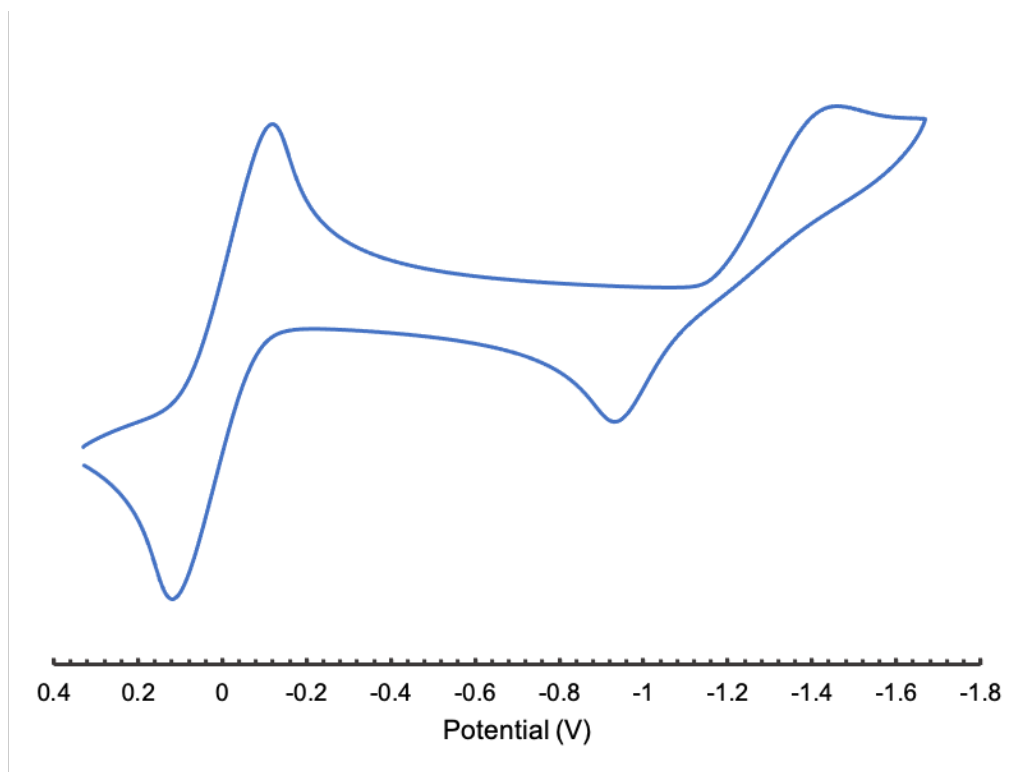

**Figure S17.** Cyclic voltammogram of [1][OTf] with ferrocene as internal reference.

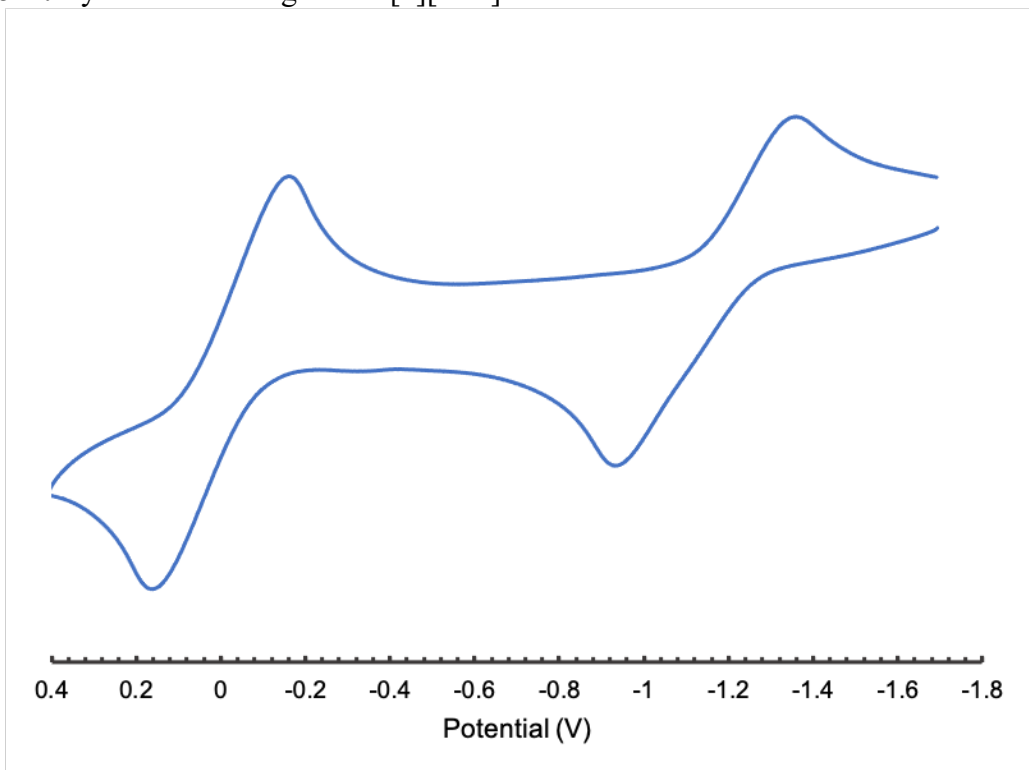

**Figure S18.** Cyclic voltammogram of 2• with ferrocene as internal reference.

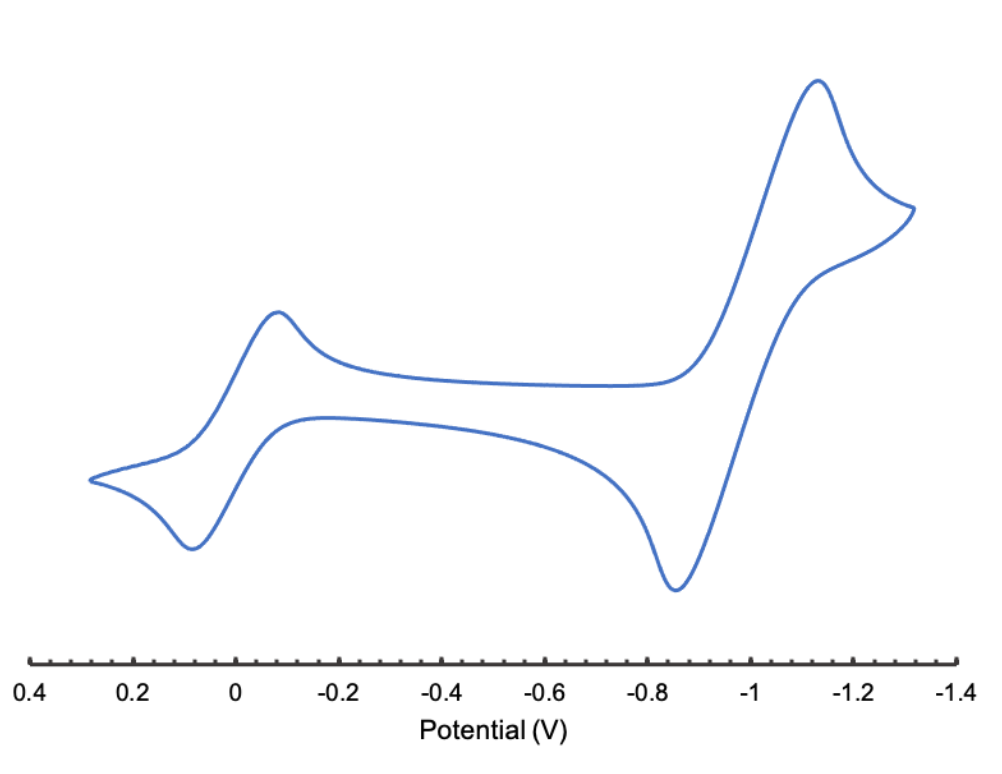

**Figure S19.** Cyclic voltammogram of [3][B(C<sub>6</sub>F<sub>5</sub>)<sub>4</sub>] with ferrocene as internal reference.

## 6. EPR spectra and simulation

Solution EPR measurement was carried out on a Bruker EMX nano spectrometer. Samples containing around 0.002 M of radical species were transferred to a quartz J-Young's tube under nitrogen atmosphere. EPR spectra were obtained with a microwave power of 0.3162 mW, modulation amplitude of 1 G, time constant of 1.28 ms, and sweep time of 10 s. The EPR spectra were simulated using Easyspin5.2.30<sup>4</sup> with hyperfine coupling constants listed in the figure caption.

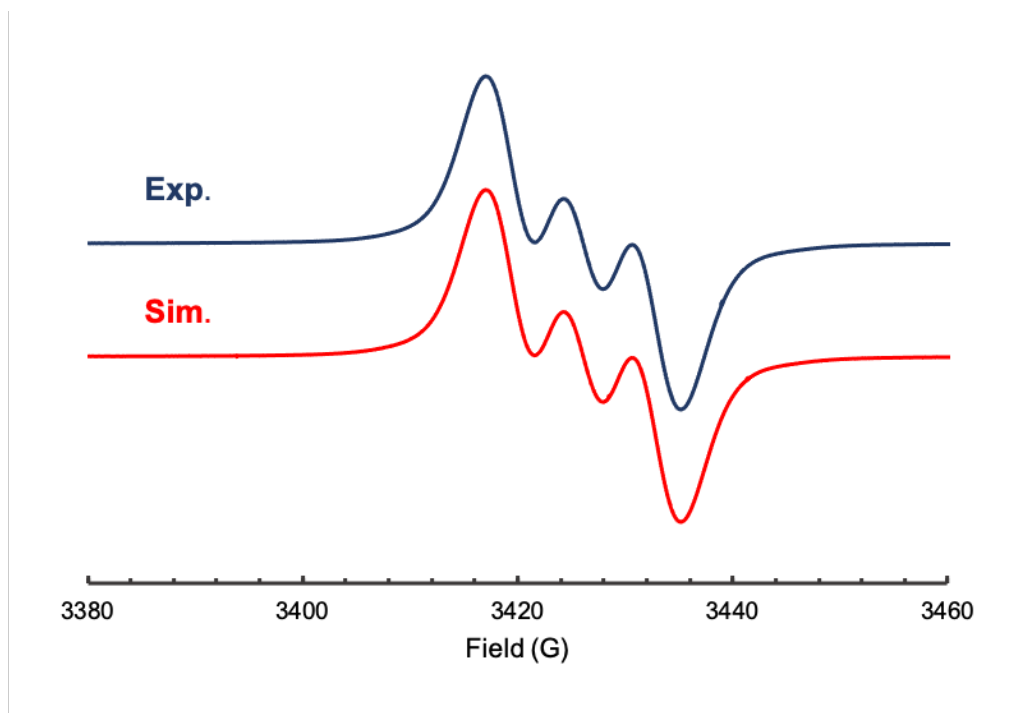

**Figure S20.** EPR spectrum of **2•** in DCM at room temperature. The simulation parameters are  $g_{\text{iso}} = 2.0047$ ,  $a(^{14}\text{N}_{\text{CAAC}}) = 6.62$  G, and  $a(^{11,10}\text{B}) = 0.77/0.26$  G.

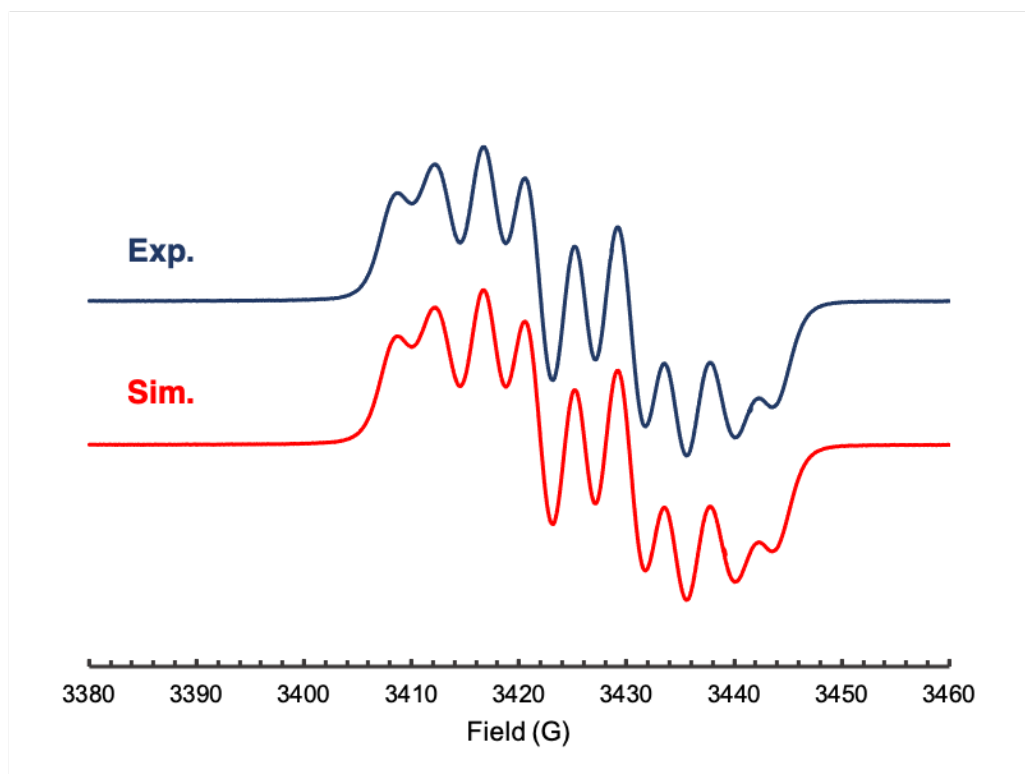

**Figure S21.** EPR spectrum of **[3][B(C<sub>6</sub>F<sub>5</sub>)<sub>4</sub>]** in DCM at room temperature. The simulation parameters are  $g_{\text{iso}} = 2.0047$ ,  $a(^{11,10}\text{B}) = 3.82/1.27$  G,  $a(^{14}\text{N}_{\text{CAAC}}) = 8.32$  G, and  $a(^{14}\text{N}_{\text{TMP}}) = 2.42$  G.

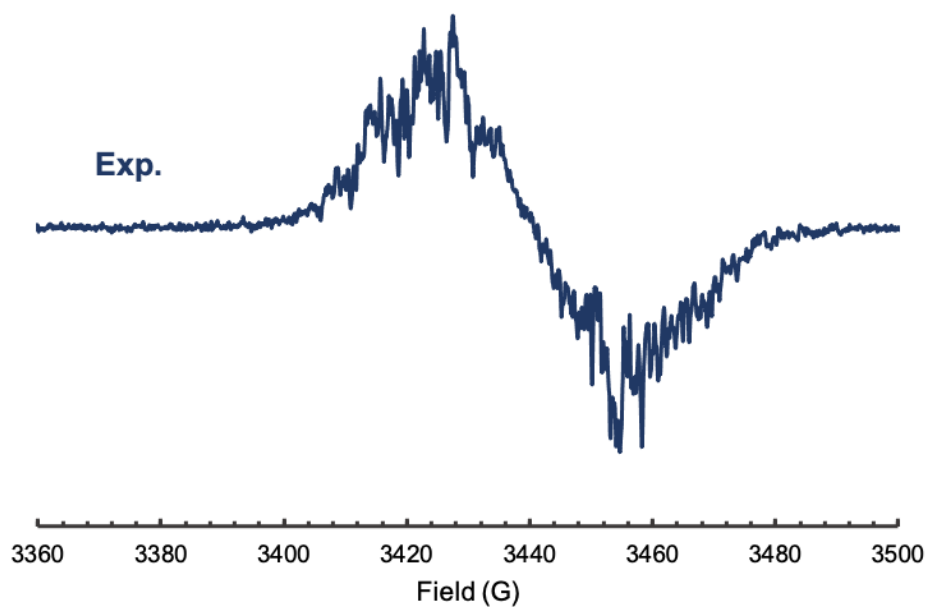

**Figure S22.** EPR spectrum of [6][B(C<sub>6</sub>F<sub>5</sub>)<sub>4</sub>] in DCM at 77 K.

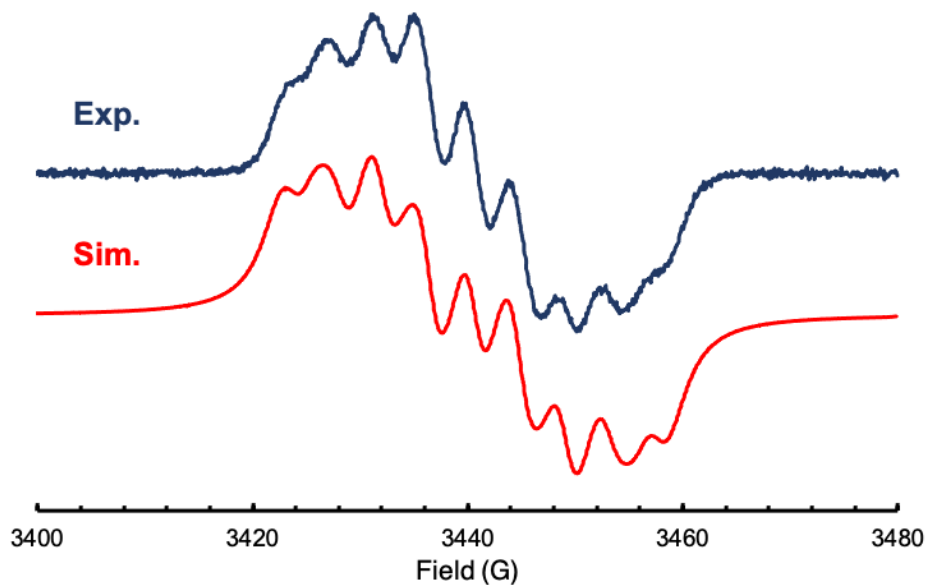

**Figure S23.** EPR spectrum of [9][B(C<sub>6</sub>F<sub>5</sub>)<sub>4</sub>] in DCM at room temperature. The simulation parameters are  $g_{\text{iso}} = 2.0032$ ,  $a(^{11,10}\text{B}) = 4.09$  G,  $a(^{14}\text{N}_{\text{cAAC}}) = 8.38$  G, and  $a(^{14}\text{N}_{\text{CNXyl}}) = 2.39$  G.

## 7. Computational Details

Density functional theory (DFT) calculations (full geometry optimization) were carried out with Gaussian 16 program package<sup>5</sup> at the theory level of UCAM-B3LYP/6-31G(d,p)/SMD(CH<sub>2</sub>Cl<sub>2</sub>). Frequency calculations were performed to verify the optimized structures as minima. The molecular orbital surface was generated by GaussView 6.<sup>6</sup> The redox potentials are calculated in terms of Gibbs free energy change of the corresponding solvated redox reaction.<sup>7</sup>

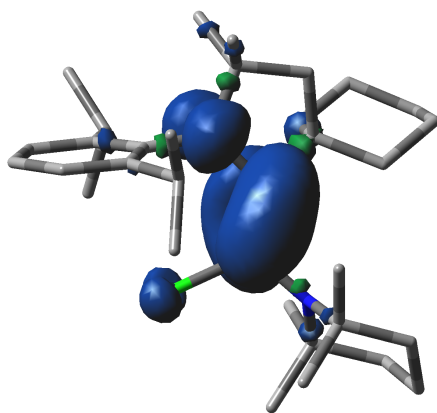

**2<sup>\*</sup>**

N<sub>cAAC</sub>: 19.8%, C<sub>cAAC</sub>: 48.4%, B: 30.8%, Cl:  
0.1%, N<sub>TMP</sub>: 0.1%

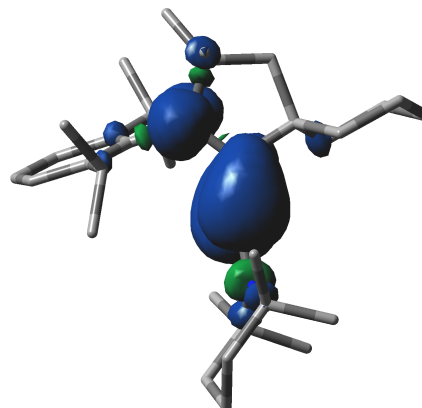

**[3]<sup>+</sup>**

N<sub>cAAC</sub>: 33.6%, C<sub>cAAC</sub>: 18.8%, B: 46.4%,  
N<sub>TMP</sub>: 0.3%

**Figure S24.** Spin density plots of **2<sup>\*</sup>** and **[3]<sup>+</sup>** (isovalue = 0.002). Hydrogen atoms are omitted for clarity.

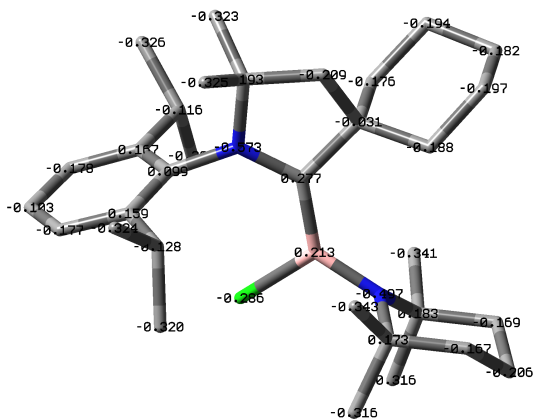

**2<sup>\*</sup>**

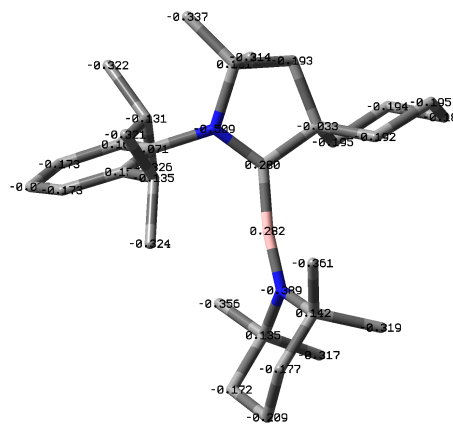

**[3]<sup>+</sup>**

**Figure S25.** Mulliken charges of **2<sup>\*</sup>** and **[3]<sup>+</sup>**. Hydrogen atoms are omitted for clarity.

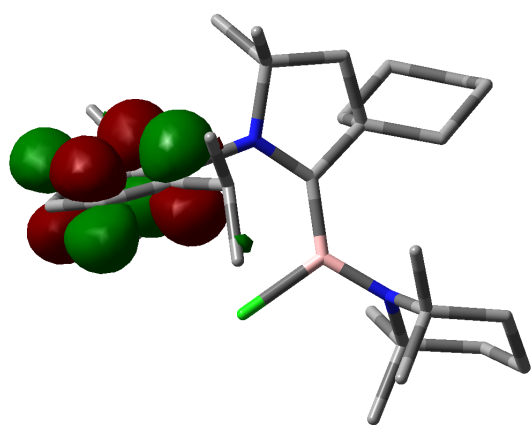

LUMO+1 (1.46)

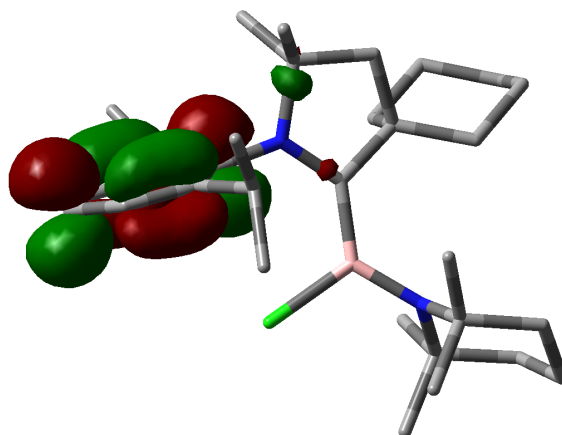

LUMO (1.35)

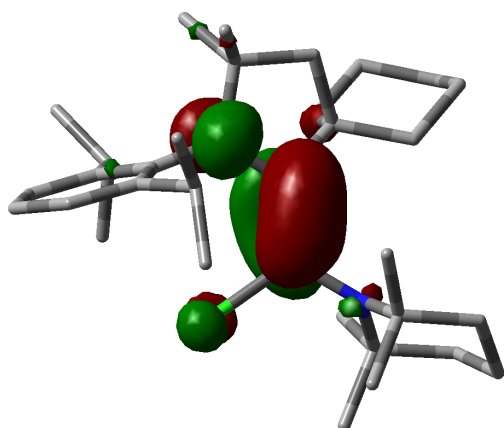

SOMO (-5.56)

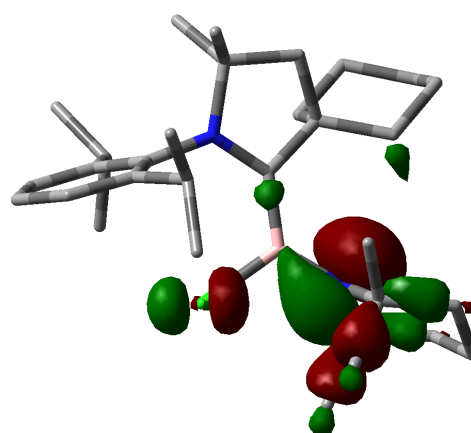

SOMO-1 (-6.72)

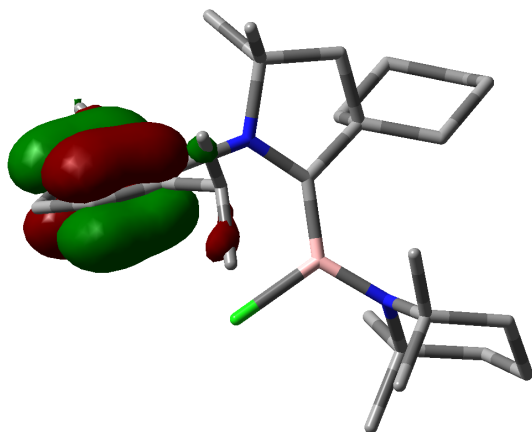

SOMO-2 (-7.64)

**Figure S26.** Selected molecular orbitals of  $2^*$  (isovalue = 0.05). Hydrogen atoms are omitted for clarity.

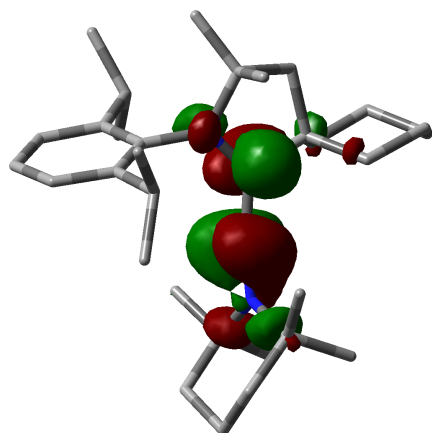

LUMO+3 (1.50)

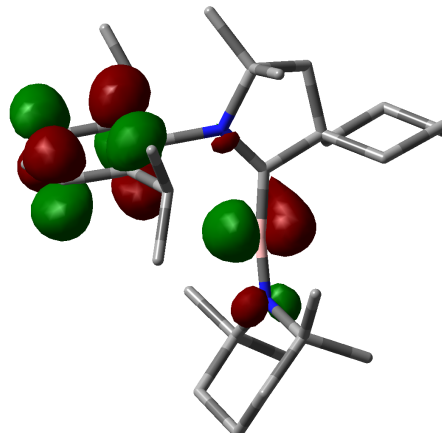

LUMO+2 (1.02)

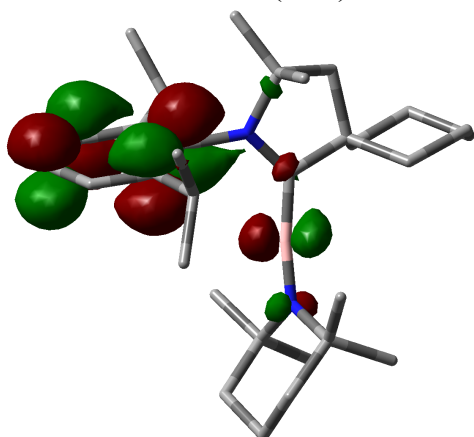

LUMO+1 (0.87)

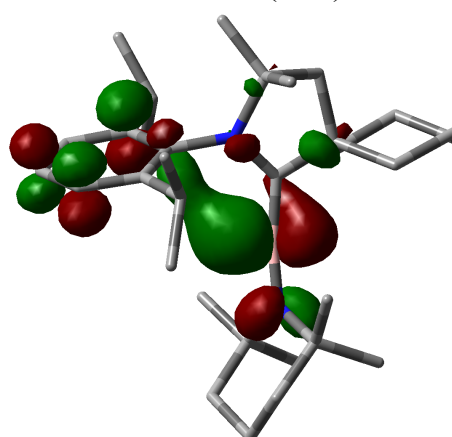

LUMO (0.66)

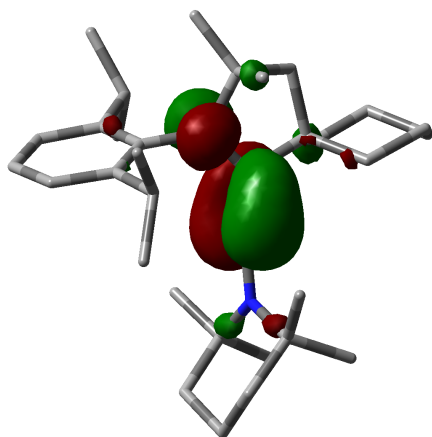

SOMO (-7.01)

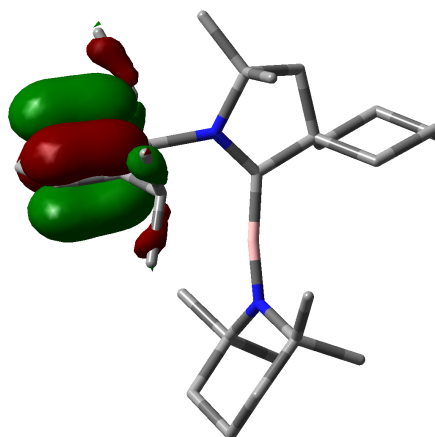

SOMO-1 (-8.15)

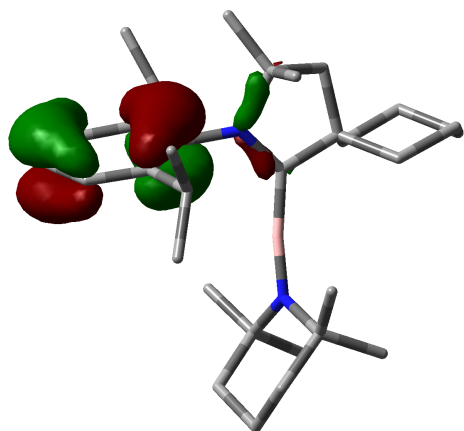

SOMO-2 (-8.51)

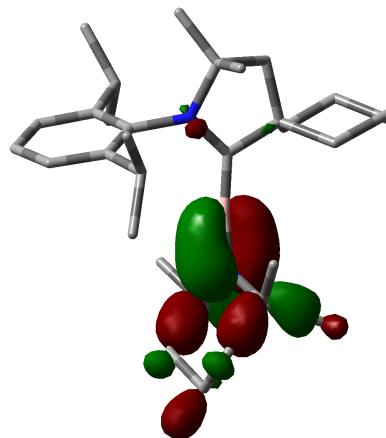

SOMO-3 (-9.36)

**Figure S27.** Selected molecular orbitals of  $[3]^+$  (isovalue = 0.05). Hydrogen atoms are omitted for clarity.

**Table S5.** Calculated Gibbs free energy (Hartree) at UCAM-B3LYP/6-31G\*\*/SMD(CH<sub>2</sub>Cl<sub>2</sub>) level.

|                   | Gibbs free energy (Hartree) |
|-------------------|-----------------------------|
| [1] <sup>+</sup>  | -1844.324352                |
| 2 <sup>•</sup>    | -1844.460150                |
| [3] <sup>++</sup> | -1384.088845                |
| 4                 | -1384.217597                |
| [8] <sup>++</sup> | -1497.345888                |
| 7                 | -1497.495492                |

**Table S6.** Calculated redox potential (eV) at UCAM-B3LYP/6-31G\*\*/SMD(CH<sub>2</sub>Cl<sub>2</sub>) level.

| Reaction                                           | $\Delta G^\circ$ | $E_{1/2}$ (vs. SHE <sup>a</sup> ) | $E_{1/2}$ (vs. Fc/Fc <sup>+</sup> <sup>b</sup> ) |
|----------------------------------------------------|------------------|-----------------------------------|--------------------------------------------------|
| [1] <sup>+</sup> + e <sup>-</sup> → 2 <sup>•</sup> | -3.69525         | -0.58                             | -0.98                                            |
| [3] <sup>++</sup> + e <sup>-</sup> → 4             | -3.50352         | -0.78                             | -1.18                                            |
| [8] <sup>++</sup> + e <sup>-</sup> → 7             | -4.07093         | -0.21                             | -0.61                                            |

*a.*  $\Delta G^\circ_{\text{SHE}} = -4.28$  eV.<sup>8</sup> *b.* Fc/Fc<sup>+</sup>,  $E_{1/2} = 0.4$  V (vs. SHE).

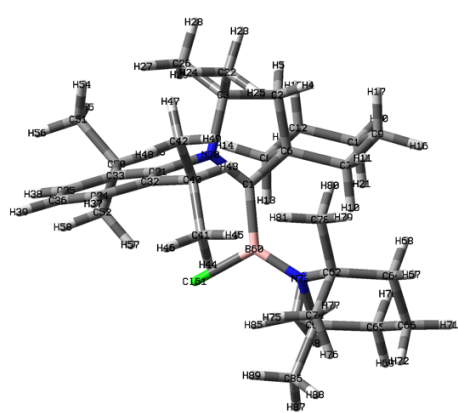

[1]<sup>+</sup>

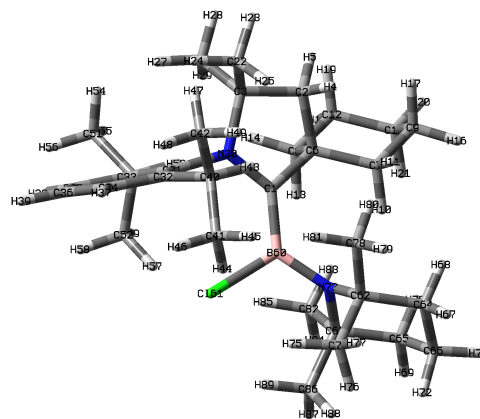

2<sup>•</sup>

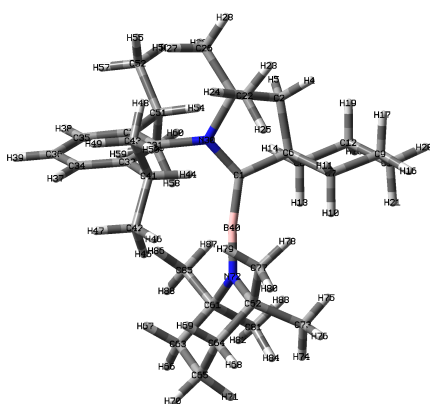

[3]<sup>++</sup>

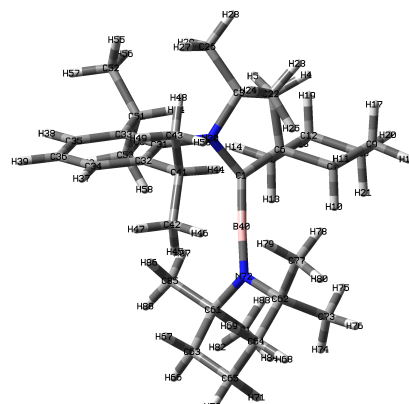

4

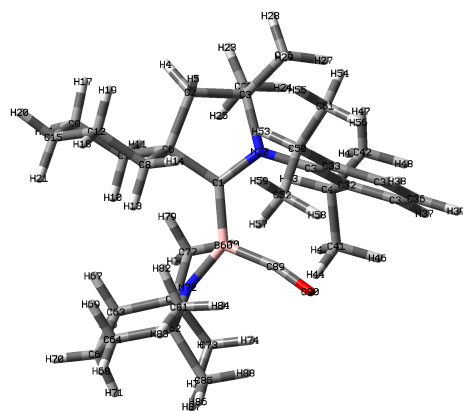

[8]<sup>++</sup>

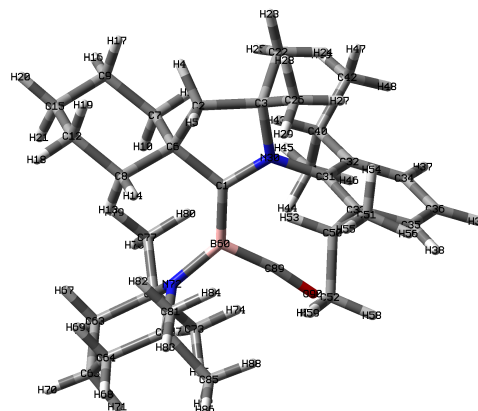

7

**Figure S28.** Optimized structure at UCAM-B3LYP/6-31G\*\*/SMD(CH<sub>2</sub>Cl<sub>2</sub>) level. Hydrogen atoms are omitted for clarity.

**Table S5.** Cartesian coordinates for the optimized geometry of [1]<sup>+</sup>.

| <b>Label</b> | <b>Element</b> | <b>X</b> | <b>Y</b> | <b>Z</b> |
|--------------|----------------|----------|----------|----------|
| 1            | C              | -1.10065 | 0.62481  | -0.09404 |
| 2            | C              | 0.93221  | 1.82242  | 0.30615  |
| 3            | C              | -0.24174 | 2.80732  | 0.32441  |
| 4            | H              | 1.28153  | 1.64218  | 1.32599  |
| 5            | H              | 1.76989  | 2.23387  | -0.25674 |
| 6            | C              | 0.42031  | 0.50612  | -0.29167 |
| 7            | C              | 1.14555  | -0.71486 | 0.30244  |
| 8            | C              | 0.59184  | 0.4511   | -1.84678 |
| 9            | C              | 2.61073  | -0.79834 | -0.1361  |
| 10           | H              | 0.63059  | -1.62892 | -0.00008 |
| 11           | H              | 1.11775  | -0.67274 | 1.3918   |
| 12           | C              | 2.05066  | 0.32746  | -2.29295 |
| 13           | H              | 0.0344   | -0.40928 | -2.23267 |
| 14           | H              | 0.15306  | 1.33927  | -2.30122 |
| 15           | C              | 2.74524  | -0.86848 | -1.6528  |
| 16           | H              | 3.06173  | -1.67908 | 0.33181  |
| 17           | H              | 3.1639   | 0.07062  | 0.2411   |
| 18           | H              | 2.06665  | 0.24914  | -3.38461 |
| 19           | H              | 2.59708  | 1.24364  | -2.04087 |
| 20           | H              | 3.79959  | -0.89776 | -1.94521 |
| 21           | H              | 2.28831  | -1.79744 | -2.01743 |
| 22           | C              | -0.42094 | 3.42554  | 1.70552  |
| 23           | H              | 0.48545  | 3.99472  | 1.92768  |
| 24           | H              | -1.26209 | 4.11845  | 1.73147  |
| 25           | H              | -0.53807 | 2.67166  | 2.48497  |
| 26           | C              | -0.07879 | 3.93457  | -0.68278 |
| 27           | H              | -0.95738 | 4.57868  | -0.70535 |
| 28           | H              | 0.76509  | 4.5434   | -0.34971 |
| 29           | H              | 0.14701  | 3.57974  | -1.68677 |
| 30           | N              | -1.44266 | 1.88232  | 0.01168  |
| 31           | C              | -2.78345 | 2.47989  | -0.19256 |
| 32           | C              | -3.65955 | 2.66148  | 0.89779  |
| 33           | C              | -3.1435  | 2.92514  | -1.49352 |
| 34           | C              | -4.89514 | 3.26885  | 0.66275  |
| 35           | C              | -4.39704 | 3.51491  | -1.65243 |
| 36           | C              | -5.27143 | 3.69055  | -0.59583 |

|    |    |          |          |          |
|----|----|----------|----------|----------|
| 37 | H  | -5.57472 | 3.4053   | 1.49609  |
| 38 | H  | -4.68963 | 3.85226  | -2.6402  |
| 39 | H  | -6.23812 | 4.15725  | -0.75453 |
| 40 | C  | -3.40911 | 2.20945  | 2.32843  |
| 41 | C  | -4.41322 | 1.11689  | 2.72221  |
| 42 | C  | -3.49686 | 3.35973  | 3.34035  |
| 43 | H  | -2.40448 | 1.79651  | 2.38976  |
| 44 | H  | -4.43545 | 0.29953  | 1.99835  |
| 45 | H  | -4.16321 | 0.70056  | 3.70254  |
| 46 | H  | -5.4253  | 1.52638  | 2.78431  |
| 47 | H  | -2.83859 | 4.19274  | 3.08735  |
| 48 | H  | -4.51585 | 3.74958  | 3.41118  |
| 49 | H  | -3.2164  | 2.99771  | 4.33413  |
| 50 | C  | -2.29284 | 2.86253  | -2.76443 |
| 51 | C  | -2.03893 | 4.2689   | -3.33728 |
| 52 | C  | -2.92285 | 2.01964  | -3.8833  |
| 53 | H  | -1.33314 | 2.41315  | -2.52382 |
| 54 | H  | -1.69247 | 4.98389  | -2.59111 |
| 55 | H  | -1.28677 | 4.21421  | -4.13004 |
| 56 | H  | -2.95157 | 4.67403  | -3.7834  |
| 57 | H  | -3.04167 | 0.97424  | -3.60721 |
| 58 | H  | -3.90325 | 2.40941  | -4.17161 |
| 59 | H  | -2.2817  | 2.06321  | -4.7691  |
| 60 | B  | -2.05449 | -0.69755 | -0.27856 |
| 61 | Cl | -3.32207 | -0.45948 | -1.52325 |
| 62 | C  | -1.82352 | -2.11694 | 1.83395  |
| 63 | C  | -2.01038 | -3.23384 | -0.49615 |
| 64 | C  | -0.80404 | -3.18197 | 2.25456  |
| 65 | C  | -0.9968  | -4.26903 | 0.04446  |
| 66 | C  | -1.01828 | -4.50614 | 1.54296  |
| 67 | H  | -0.8795  | -3.30283 | 3.33983  |
| 68 | H  | 0.20543  | -2.81413 | 2.04291  |
| 69 | H  | -1.18365 | -5.20187 | -0.49634 |
| 70 | H  | 0.00896  | -3.9369  | -0.24026 |
| 71 | H  | -0.22659 | -5.21195 | 1.8128   |
| 72 | H  | -1.96108 | -4.96774 | 1.85273  |
| 73 | N  | -1.88581 | -1.95533 | 0.32923  |
| 74 | C  | -3.22216 | -2.49153 | 2.36578  |
| 75 | H  | -3.98515 | -1.82687 | 1.95591  |

|    |   |          |          |          |
|----|---|----------|----------|----------|
| 76 | H | -3.51225 | -3.5156  | 2.14423  |
| 77 | H | -3.22715 | -2.38226 | 3.45403  |
| 78 | C | -1.46186 | -0.80181 | 2.51441  |
| 79 | H | -1.42893 | -0.9691  | 3.59366  |
| 80 | H | -0.48884 | -0.41424 | 2.22356  |
| 81 | H | -2.22307 | -0.04869 | 2.33343  |
| 82 | C | -1.56742 | -3.00599 | -1.95291 |
| 83 | H | -0.6436  | -2.42395 | -2.003   |
| 84 | H | -1.36198 | -3.98318 | -2.39705 |
| 85 | H | -2.32153 | -2.52692 | -2.57269 |
| 86 | C | -3.4296  | -3.82231 | -0.51895 |
| 87 | H | -3.49202 | -4.55667 | -1.32723 |
| 88 | H | -3.6946  | -4.3373  | 0.40328  |
| 89 | H | -4.17629 | -3.05037 | -0.71178 |

**Table S6.** Cartesian coordinates for the optimized geometry of **2**.

| <b>Label</b> | <b>Element</b> | <b>X</b> | <b>Y</b> | <b>Z</b> |
|--------------|----------------|----------|----------|----------|
| 1            | C              | -1.1329  | 0.60701  | -0.05849 |
| 2            | C              | 0.86772  | 1.85008  | 0.40724  |
| 3            | C              | -0.2668  | 2.85841  | 0.21751  |
| 4            | H              | 1.03775  | 1.69328  | 1.47739  |
| 5            | H              | 1.80033  | 2.22693  | -0.01526 |
| 6            | C              | 0.40789  | 0.52637  | -0.22016 |
| 7            | C              | 1.12712  | -0.65889 | 0.44806  |
| 8            | C              | 0.73462  | 0.48302  | -1.7424  |
| 9            | C              | 2.62886  | -0.69793 | 0.14659  |
| 10           | H              | 0.66658  | -1.59159 | 0.11892  |
| 11           | H              | 0.98975  | -0.60739 | 1.53042  |
| 12           | C              | 2.23025  | 0.41163  | -2.06302 |
| 13           | H              | 0.24524  | -0.39277 | -2.1733  |
| 14           | H              | 0.30066  | 1.34732  | -2.24617 |
| 15           | C              | 2.903    | -0.76002 | -1.35335 |
| 16           | H              | 3.07021  | -1.56473 | 0.65084  |
| 17           | H              | 3.12135  | 0.18719  | 0.56907  |
| 18           | H              | 2.35669  | 0.3278   | -3.14813 |
| 19           | H              | 2.72608  | 1.34474  | -1.769   |
| 20           | H              | 3.98082  | -0.76061 | -1.54963 |
| 21           | H              | 2.50849  | -1.70329 | -1.75406 |
| 22           | C              | -0.42525 | 3.71172  | 1.47547  |
| 23           | H              | 0.50035  | 4.27468  | 1.6276   |
| 24           | H              | -1.23807 | 4.43347  | 1.37658  |
| 25           | H              | -0.59134 | 3.10084  | 2.36291  |
| 26           | C              | -0.01387 | 3.82509  | -0.94343 |
| 27           | H              | -0.86248 | 4.49732  | -1.08219 |
| 28           | H              | 0.85525  | 4.44112  | -0.69696 |
| 29           | H              | 0.19412  | 3.32362  | -1.88735 |
| 30           | N              | -1.45319 | 1.95334  | -0.01237 |
| 31           | C              | -2.75634 | 2.56972  | -0.17438 |
| 32           | C              | -3.56365 | 2.85572  | 0.94947  |
| 33           | C              | -3.19169 | 2.93777  | -1.4696  |
| 34           | C              | -4.75546 | 3.55656  | 0.75642  |
| 35           | C              | -4.39509 | 3.63008  | -1.60215 |
| 36           | C              | -5.16984 | 3.95529  | -0.50195 |

|    |    |          |          |          |
|----|----|----------|----------|----------|
| 37 | H  | -5.37758 | 3.78092  | 1.61664  |
| 38 | H  | -4.73324 | 3.91196  | -2.59392 |
| 39 | H  | -6.10041 | 4.50044  | -0.62679 |
| 40 | C  | -3.27528 | 2.37383  | 2.36702  |
| 41 | C  | -4.33654 | 1.35897  | 2.81928  |
| 42 | C  | -3.22523 | 3.51494  | 3.39254  |
| 43 | H  | -2.30915 | 1.86679  | 2.36342  |
| 44 | H  | -4.42326 | 0.5237   | 2.12314  |
| 45 | H  | -4.08422 | 0.96154  | 3.80766  |
| 46 | H  | -5.32006 | 1.83265  | 2.89685  |
| 47 | H  | -2.52544 | 4.30418  | 3.11432  |
| 48 | H  | -4.21079 | 3.97345  | 3.51777  |
| 49 | H  | -2.92317 | 3.12552  | 4.37004  |
| 50 | C  | -2.46135 | 2.56915  | -2.75584 |
| 51 | C  | -2.16698 | 3.78518  | -3.64448 |
| 52 | C  | -3.25237 | 1.53663  | -3.57138 |
| 53 | H  | -1.51461 | 2.10796  | -2.48356 |
| 54 | H  | -1.64589 | 4.58098  | -3.10905 |
| 55 | H  | -1.54328 | 3.48528  | -4.4927  |
| 56 | H  | -3.08831 | 4.20897  | -4.05552 |
| 57 | H  | -3.45349 | 0.63409  | -2.99319 |
| 58 | H  | -4.2131  | 1.94673  | -3.89949 |
| 59 | H  | -2.68948 | 1.25556  | -4.46761 |
| 60 | B  | -2.08791 | -0.5881  | -0.02167 |
| 61 | Cl | -3.88013 | -0.27346 | -0.48036 |
| 62 | C  | -1.94199 | -2.34663 | 1.80032  |
| 63 | C  | -1.90528 | -3.06783 | -0.65034 |
| 64 | C  | -0.97694 | -3.49907 | 2.13087  |
| 65 | C  | -0.93106 | -4.19759 | -0.26195 |
| 66 | C  | -1.09778 | -4.67771 | 1.17339  |
| 67 | H  | -1.15832 | -3.82165 | 3.16248  |
| 68 | H  | 0.04854  | -3.11258 | 2.09269  |
| 69 | H  | -1.0627  | -5.02841 | -0.96447 |
| 70 | H  | 0.09367  | -3.82904 | -0.39314 |
| 71 | H  | -0.33601 | -5.42948 | 1.40682  |
| 72 | H  | -2.06554 | -5.17498 | 1.30015  |
| 73 | N  | -1.7922  | -1.96834 | 0.35838  |
| 74 | C  | -3.38522 | -2.74604 | 2.18815  |
| 75 | H  | -4.10455 | -2.02151 | 1.80101  |

|    |   |          |          |          |
|----|---|----------|----------|----------|
| 76 | H | -3.67371 | -3.73235 | 1.82858  |
| 77 | H | -3.47735 | -2.76448 | 3.27893  |
| 78 | C | -1.587   | -1.16515 | 2.70931  |
| 79 | H | -1.61122 | -1.50163 | 3.75     |
| 80 | H | -0.59375 | -0.76925 | 2.50811  |
| 81 | H | -2.30799 | -0.35232 | 2.61342  |
| 82 | C | -1.45514 | -2.53983 | -2.01569 |
| 83 | H | -0.42327 | -2.19027 | -1.97731 |
| 84 | H | -1.50624 | -3.34406 | -2.75509 |
| 85 | H | -2.09012 | -1.72494 | -2.37512 |
| 86 | C | -3.31954 | -3.6597  | -0.84769 |
| 87 | H | -3.31806 | -4.29678 | -1.73803 |
| 88 | H | -3.64646 | -4.28065 | -0.01505 |
| 89 | H | -4.05892 | -2.87297 | -0.99722 |

**Table S7.** Cartesian coordinates for the optimized geometry of [3]<sup>+</sup>.

| <b>Label</b> | <b>Element</b> | <b>X</b> | <b>Y</b> | <b>Z</b> |
|--------------|----------------|----------|----------|----------|
| 1            | C              | -0.97684 | 0.70971  | -0.0427  |
| 2            | C              | 0.8148   | 2.27465  | -0.33028 |
| 3            | C              | -0.41829 | 2.98316  | 0.24864  |
| 4            | H              | 1.71446  | 2.56286  | 0.21503  |
| 5            | H              | 0.95007  | 2.58021  | -1.37149 |
| 6            | C              | 0.54371  | 0.75271  | -0.25953 |
| 7            | C              | 1.33749  | 0.04792  | 0.86119  |
| 8            | C              | 0.87363  | 0.05544  | -1.6008  |
| 9            | C              | 2.84143  | -0.00564 | 0.57991  |
| 10           | H              | 0.9643   | -0.9792  | 0.9545   |
| 11           | H              | 1.15276  | 0.54015  | 1.82045  |
| 12           | C              | 2.37469  | 0.03191  | -1.89234 |
| 13           | H              | 0.50834  | -0.97881 | -1.55749 |
| 14           | H              | 0.33117  | 0.55278  | -2.41157 |
| 15           | C              | 3.14282  | -0.65989 | -0.76759 |
| 16           | H              | 3.33761  | -0.55127 | 1.38908  |
| 17           | H              | 3.25788  | 1.0088   | 0.59099  |
| 18           | H              | 2.5501   | -0.47584 | -2.84636 |
| 19           | H              | 2.74491  | 1.0577   | -2.01272 |
| 20           | H              | 4.21874  | -0.63662 | -0.96872 |
| 21           | H              | 2.85109  | -1.7178  | -0.73041 |
| 22           | C              | -0.28721 | 3.17448  | 1.76439  |
| 23           | H              | 0.60128  | 3.77777  | 1.96859  |
| 24           | H              | -1.14824 | 3.70238  | 2.17518  |
| 25           | H              | -0.17895 | 2.22262  | 2.28792  |
| 26           | C              | -0.67657 | 4.33441  | -0.39767 |
| 27           | H              | -1.62868 | 4.76328  | -0.07624 |
| 28           | H              | 0.11623  | 5.01863  | -0.08452 |
| 29           | H              | -0.65607 | 4.28252  | -1.4844  |
| 30           | N              | -1.49575 | 1.96269  | -0.03655 |
| 31           | C              | -2.87543 | 2.28156  | -0.34734 |
| 32           | C              | -3.85208 | 2.35346  | 0.66515  |
| 33           | C              | -3.21188 | 2.52944  | -1.69963 |
| 34           | C              | -5.1622  | 2.67047  | 0.29964  |
| 35           | C              | -4.53971 | 2.82643  | -2.00409 |
| 36           | C              | -5.51054 | 2.90087  | -1.01893 |

|    |   |          |          |          |
|----|---|----------|----------|----------|
| 37 | H | -5.92175 | 2.73545  | 1.07125  |
| 38 | H | -4.81317 | 3.01245  | -3.03718 |
| 39 | H | -6.53624 | 3.14177  | -1.27944 |
| 40 | B | -1.67188 | -0.55546 | 0.18195  |
| 41 | C | -3.57525 | 2.10902  | 2.13956  |
| 42 | C | -4.48462 | 1.00949  | 2.70376  |
| 43 | C | -3.75601 | 3.39339  | 2.95961  |
| 44 | H | -2.53997 | 1.77827  | 2.24365  |
| 45 | H | -4.43404 | 0.09442  | 2.10839  |
| 46 | H | -4.19546 | 0.76621  | 3.73048  |
| 47 | H | -5.52912 | 1.33231  | 2.72722  |
| 48 | H | -3.15806 | 4.22099  | 2.57028  |
| 49 | H | -4.80251 | 3.71289  | 2.95266  |
| 50 | H | -3.4667  | 3.22462  | 4.00138  |
| 51 | C | -2.21692 | 2.51419  | -2.85487 |
| 52 | C | -2.21601 | 3.84801  | -3.61721 |
| 53 | C | -2.50249 | 1.37853  | -3.84403 |
| 54 | H | -1.21689 | 2.35374  | -2.44874 |
| 55 | H | -2.11454 | 4.71     | -2.95459 |
| 56 | H | -1.38918 | 3.86904  | -4.33358 |
| 57 | H | -3.1423  | 3.97608  | -4.18457 |
| 58 | H | -2.46346 | 0.39972  | -3.36679 |
| 59 | H | -3.49243 | 1.49141  | -4.29657 |
| 60 | H | -1.76571 | 1.39108  | -4.65322 |
| 61 | C | -2.80675 | -2.59889 | -0.647   |
| 62 | C | -2.00167 | -2.37804 | 1.84011  |
| 63 | C | -4.12961 | -3.15364 | -0.10301 |
| 64 | C | -3.35794 | -2.96127 | 2.26243  |
| 65 | C | -3.98365 | -3.88452 | 1.22488  |
| 66 | H | -4.55194 | -3.81318 | -0.86745 |
| 67 | H | -4.82878 | -2.318   | 0.02133  |
| 68 | H | -3.20845 | -3.48695 | 3.21062  |
| 69 | H | -4.04407 | -2.13068 | 2.46281  |
| 70 | H | -4.96746 | -4.21206 | 1.57353  |
| 71 | H | -3.3828  | -4.79133 | 1.10139  |
| 72 | N | -2.13578 | -1.78895 | 0.44487  |
| 73 | C | -0.89591 | -3.44089 | 1.88098  |
| 74 | H | -1.17734 | -4.37809 | 1.40482  |
| 75 | H | 0.01929  | -3.07369 | 1.41009  |

|    |   |          |          |          |
|----|---|----------|----------|----------|
| 76 | H | -0.66974 | -3.66307 | 2.92719  |
| 77 | C | -1.61616 | -1.2707  | 2.81993  |
| 78 | H | -0.60575 | -0.89824 | 2.63997  |
| 79 | H | -2.31567 | -0.43534 | 2.78221  |
| 80 | H | -1.64027 | -1.68068 | 3.83266  |
| 81 | C | -1.88786 | -3.7153  | -1.15885 |
| 82 | H | -2.31188 | -4.11607 | -2.08333 |
| 83 | H | -0.89255 | -3.32525 | -1.38705 |
| 84 | H | -1.78281 | -4.54593 | -0.46374 |
| 85 | C | -3.10026 | -1.66891 | -1.8196  |
| 86 | H | -3.68622 | -0.79795 | -1.51238 |
| 87 | H | -2.17508 | -1.33383 | -2.29533 |
| 88 | H | -3.67705 | -2.21216 | -2.57214 |

**Table S8.** Cartesian coordinates for the optimized geometry of **4**.

| <b>Label</b> | <b>Element</b> | <b>X</b> | <b>Y</b> | <b>Z</b> |
|--------------|----------------|----------|----------|----------|
| 1            | C              | -0.99834 | 0.65159  | -0.01023 |
| 2            | C              | 0.75752  | 2.29296  | -0.26988 |
| 3            | C              | -0.49054 | 2.92868  | 0.3813   |
| 4            | H              | 1.66713  | 2.54798  | 0.28027  |
| 5            | H              | 0.87239  | 2.69653  | -1.28107 |
| 6            | C              | 0.51057  | 0.75988  | -0.33483 |
| 7            | C              | 1.38241  | -0.00782 | 0.68274  |
| 8            | C              | 0.83435  | 0.20223  | -1.73994 |
| 9            | C              | 2.87832  | 0.00393  | 0.35321  |
| 10           | H              | 1.04008  | -1.05062 | 0.70643  |
| 11           | H              | 1.21847  | 0.39391  | 1.6877   |
| 12           | C              | 2.32394  | 0.25385  | -2.08737 |
| 13           | H              | 0.50358  | -0.84383 | -1.77831 |
| 14           | H              | 0.24924  | 0.74124  | -2.49111 |
| 15           | C              | 3.15238  | -0.51383 | -1.05831 |
| 16           | H              | 3.42042  | -0.59806 | 1.09135  |
| 17           | H              | 3.27065  | 1.02471  | 0.44299  |
| 18           | H              | 2.48638  | -0.15612 | -3.09075 |
| 19           | H              | 2.66205  | 1.2978   | -2.12112 |
| 20           | H              | 4.22075  | -0.44222 | -1.29098 |
| 21           | H              | 2.88945  | -1.57909 | -1.10992 |
| 22           | C              | -0.32252 | 2.97375  | 1.91113  |
| 23           | H              | 0.58732  | 3.51938  | 2.18247  |
| 24           | H              | -1.16619 | 3.47908  | 2.38662  |
| 25           | H              | -0.24998 | 1.96623  | 2.32753  |
| 26           | C              | -0.73427 | 4.34713  | -0.11987 |
| 27           | H              | -1.66391 | 4.76075  | 0.28176  |
| 28           | H              | 0.08419  | 4.99447  | 0.20906  |
| 29           | H              | -0.77872 | 4.39276  | -1.2084  |
| 30           | N              | -1.54049 | 1.97841  | -0.02996 |
| 31           | C              | -2.86535 | 2.31029  | -0.44245 |
| 32           | C              | -3.9249  | 2.35921  | 0.49323  |
| 33           | C              | -3.14119 | 2.59144  | -1.80557 |
| 34           | C              | -5.21243 | 2.68694  | 0.06188  |
| 35           | C              | -4.44581 | 2.89956  | -2.19177 |
| 36           | C              | -5.47966 | 2.95294  | -1.27021 |

|    |   |          |          |          |
|----|---|----------|----------|----------|
| 37 | H | -6.01992 | 2.73153  | 0.78646  |
| 38 | H | -4.65325 | 3.10828  | -3.23702 |
| 39 | H | -6.48746 | 3.20164  | -1.58938 |
| 40 | B | -1.62966 | -0.55865 | 0.33616  |
| 41 | C | -3.72149 | 2.07121  | 1.97122  |
| 42 | C | -4.64942 | 0.95553  | 2.46653  |
| 43 | C | -3.92419 | 3.33307  | 2.81949  |
| 44 | H | -2.69144 | 1.73373  | 2.09645  |
| 45 | H | -4.52961 | 0.0449   | 1.87379  |
| 46 | H | -4.43199 | 0.71249  | 3.5116   |
| 47 | H | -5.70129 | 1.25314  | 2.41429  |
| 48 | H | -3.28722 | 4.15628  | 2.48456  |
| 49 | H | -4.96215 | 3.67813  | 2.76764  |
| 50 | H | -3.69373 | 3.13315  | 3.87113  |
| 51 | C | -2.07054 | 2.57379  | -2.88517 |
| 52 | C | -1.99961 | 3.8998   | -3.6542  |
| 53 | C | -2.28076 | 1.42028  | -3.87262 |
| 54 | H | -1.11414 | 2.41807  | -2.38597 |
| 55 | H | -1.89994 | 4.75935  | -2.98624 |
| 56 | H | -1.14065 | 3.89813  | -4.3331  |
| 57 | H | -2.89542 | 4.05778  | -4.26285 |
| 58 | H | -2.29547 | 0.45404  | -3.36523 |
| 59 | H | -3.22778 | 1.53049  | -4.41145 |
| 60 | H | -1.47779 | 1.40063  | -4.61704 |
| 61 | C | -2.83842 | -2.60353 | -0.45516 |
| 62 | C | -1.9875  | -2.39765 | 1.99267  |
| 63 | C | -4.10735 | -3.26582 | 0.10648  |
| 64 | C | -3.29633 | -3.0673  | 2.44302  |
| 65 | C | -3.88264 | -4.01702 | 1.40953  |
| 66 | H | -4.50952 | -3.93179 | -0.66409 |
| 67 | H | -4.85818 | -2.48383 | 0.27397  |
| 68 | H | -3.10226 | -3.58886 | 3.38606  |
| 69 | H | -4.0303  | -2.28149 | 2.65902  |
| 70 | H | -4.8315  | -4.42434 | 1.77317  |
| 71 | H | -3.21901 | -4.87395 | 1.25163  |
| 72 | N | -2.16128 | -1.78963 | 0.62047  |
| 73 | C | -0.82836 | -3.40738 | 2.01068  |
| 74 | H | -1.04923 | -4.33226 | 1.4796   |
| 75 | H | 0.07003  | -2.96656 | 1.57103  |

|    |   |          |          |          |
|----|---|----------|----------|----------|
| 76 | H | -0.60002 | -3.67435 | 3.0468   |
| 77 | C | -1.64943 | -1.30514 | 3.00873  |
| 78 | H | -0.66402 | -0.87176 | 2.83058  |
| 79 | H | -2.38685 | -0.50117 | 2.9939   |
| 80 | H | -1.64803 | -1.74882 | 4.00881  |
| 81 | C | -1.88796 | -3.65523 | -1.04912 |
| 82 | H | -2.32862 | -4.0663  | -1.96221 |
| 83 | H | -0.93043 | -3.19814 | -1.31364 |
| 84 | H | -1.69386 | -4.49193 | -0.37885 |
| 85 | C | -3.26501 | -1.6796  | -1.59541 |
| 86 | H | -3.87257 | -0.84724 | -1.23135 |
| 87 | H | -2.40199 | -1.27179 | -2.12268 |
| 88 | H | -3.86151 | -2.252   | -2.31167 |

**Table S9.** Cartesian coordinates for the optimized geometry of 7.

| <b>Label</b> | <b>Element</b> | <b>X</b> | <b>Y</b> | <b>Z</b> |
|--------------|----------------|----------|----------|----------|
| 1            | C              | -1.00708 | 0.72804  | -0.05741 |
| 2            | C              | 0.93582  | 2.0552   | -0.58215 |
| 3            | C              | -0.24481 | 3.00972  | -0.39547 |
| 4            | H              | 1.85011  | 2.47214  | -0.15807 |
| 5            | H              | 1.11271  | 1.90731  | -1.65237 |
| 6            | C              | 0.53228  | 0.71234  | 0.05083  |
| 7            | C              | 0.92707  | 0.66319  | 1.55268  |
| 8            | C              | 1.22132  | -0.45763 | -0.67021 |
| 9            | C              | 2.44011  | 0.62285  | 1.78527  |
| 10           | H              | 0.48825  | -0.23078 | 1.99222  |
| 11           | H              | 0.49244  | 1.51103  | 2.08665  |
| 12           | C              | 2.73693  | -0.47707 | -0.45331 |
| 13           | H              | 0.78738  | -1.39619 | -0.31651 |
| 14           | H              | 1.00831  | -0.39041 | -1.74058 |
| 15           | C              | 3.09211  | -0.53422 | 1.03077  |
| 16           | H              | 2.63089  | 0.53345  | 2.8604   |
| 17           | H              | 2.90139  | 1.56667  | 1.47037  |
| 18           | H              | 3.16478  | -1.33682 | -0.98042 |
| 19           | H              | 3.19081  | 0.4162   | -0.90137 |
| 20           | H              | 4.17891  | -0.51593 | 1.16743  |
| 21           | H              | 2.7373   | -1.48534 | 1.44928  |
| 22           | C              | -0.07423 | 3.95444  | 0.79848  |
| 23           | H              | 0.78486  | 4.60484  | 0.61217  |
| 24           | H              | -0.9513  | 4.59496  | 0.90993  |
| 25           | H              | 0.09906  | 3.43435  | 1.73948  |
| 26           | C              | -0.42635 | 3.88636  | -1.63292 |
| 27           | H              | -1.30364 | 4.53155  | -1.54787 |
| 28           | H              | 0.45048  | 4.53303  | -1.73027 |
| 29           | H              | -0.50383 | 3.29326  | -2.54367 |
| 30           | N              | -1.37366 | 2.03508  | -0.21089 |
| 31           | C              | -2.73774 | 2.49262  | -0.16298 |
| 32           | C              | -3.31724 | 2.8216   | 1.08614  |
| 33           | C              | -3.49078 | 2.61454  | -1.35484 |
| 34           | C              | -4.61692 | 3.32604  | 1.10554  |
| 35           | C              | -4.78601 | 3.12568  | -1.27225 |
| 36           | C              | -5.34571 | 3.4915   | -0.06003 |

|    |   |          |          |          |
|----|---|----------|----------|----------|
| 37 | H | -5.06878 | 3.58398  | 2.05773  |
| 38 | H | -5.37145 | 3.22683  | -2.18014 |
| 39 | H | -6.35529 | 3.889    | -0.02195 |
| 40 | C | -2.63452 | 2.59437  | 2.42974  |
| 41 | C | -3.36366 | 1.51535  | 3.2437   |
| 42 | C | -2.54258 | 3.87564  | 3.26871  |
| 43 | H | -1.62373 | 2.23422  | 2.24081  |
| 44 | H | -3.44135 | 0.5758   | 2.69438  |
| 45 | H | -2.82335 | 1.31925  | 4.17545  |
| 46 | H | -4.37559 | 1.83677  | 3.5096   |
| 47 | H | -2.06416 | 4.69562  | 2.72983  |
| 48 | H | -3.53466 | 4.21656  | 3.58006  |
| 49 | H | -1.96365 | 3.68674  | 4.17824  |
| 50 | C | -3.01055 | 2.15481  | -2.72675 |
| 51 | C | -3.02059 | 3.28662  | -3.76387 |
| 52 | C | -3.87594 | 1.00071  | -3.25361 |
| 53 | H | -1.98986 | 1.78231  | -2.62236 |
| 54 | H | -2.46038 | 4.16373  | -3.43694 |
| 55 | H | -2.58349 | 2.93714  | -4.7046  |
| 56 | H | -4.04374 | 3.60827  | -3.98089 |
| 57 | H | -3.91357 | 0.16665  | -2.55238 |
| 58 | H | -4.90242 | 1.33125  | -3.43976 |
| 59 | H | -3.47195 | 0.62959  | -4.20085 |
| 60 | B | -1.96295 | -0.45325 | 0.02984  |
| 61 | C | -1.94005 | -2.74695 | 1.25857  |
| 62 | C | -2.0111  | -2.66663 | -1.295   |
| 63 | C | -1.27906 | -4.13594 | 1.14568  |
| 64 | C | -1.3377  | -4.05342 | -1.31124 |
| 65 | C | -1.67825 | -4.9051  | -0.10073 |
| 66 | H | -1.51274 | -4.70498 | 2.05231  |
| 67 | H | -0.19064 | -3.99684 | 1.13046  |
| 68 | H | -1.6159  | -4.56212 | -2.24103 |
| 69 | H | -0.25024 | -3.90945 | -1.34084 |
| 70 | H | -1.14439 | -5.86088 | -0.14499 |
| 71 | H | -2.74644 | -5.14817 | -0.08271 |
| 72 | N | -1.72997 | -1.9592  | 0.00073  |
| 73 | C | -3.41788 | -2.92423 | 1.67553  |
| 74 | H | -3.91048 | -1.95978 | 1.81326  |
| 75 | H | -4.00399 | -3.49861 | 0.95935  |

|    |   |          |          |          |
|----|---|----------|----------|----------|
| 76 | H | -3.46829 | -3.45301 | 2.63298  |
| 77 | C | -1.24455 | -2.05282 | 2.43156  |
| 78 | H | -1.41881 | -2.62086 | 3.35056  |
| 79 | H | -0.16625 | -2.01033 | 2.26954  |
| 80 | H | -1.6178  | -1.03871 | 2.58711  |
| 81 | C | -1.40308 | -1.88865 | -2.46784 |
| 82 | H | -0.32127 | -1.80831 | -2.3687  |
| 83 | H | -1.61468 | -2.41918 | -3.40131 |
| 84 | H | -1.81615 | -0.88295 | -2.55284 |
| 85 | C | -3.51203 | -2.84768 | -1.62216 |
| 86 | H | -3.62171 | -3.22417 | -2.64442 |
| 87 | H | -4.01251 | -3.55927 | -0.96607 |
| 88 | H | -4.05494 | -1.90312 | -1.56479 |
| 89 | C | -3.40617 | -0.12977 | 0.10015  |
| 90 | O | -4.56672 | -0.07385 | 0.19939  |

**Table S10.** Cartesian coordinates for the optimized geometry of [8]<sup>+</sup>.

| <b>Label</b> | <b>Element</b> | <b>X</b> | <b>Y</b> | <b>Z</b> |
|--------------|----------------|----------|----------|----------|
| 1            | C              | -1.02152 | 0.73507  | -0.02988 |
| 2            | C              | 0.9128   | 2.14524  | -0.31706 |
| 3            | C              | -0.2254  | 2.94563  | 0.30973  |
| 4            | H              | 1.85176  | 2.34567  | 0.19862  |
| 5            | H              | 1.03867  | 2.45097  | -1.35937 |
| 6            | C              | 0.50293  | 0.65363  | -0.24888 |
| 7            | C              | 1.32609  | -0.13552 | 0.7924   |
| 8            | C              | 0.71723  | -0.03321 | -1.6236  |
| 9            | C              | 2.80748  | -0.24082 | 0.4143   |
| 10           | H              | 0.91919  | -1.14682 | 0.86308  |
| 11           | H              | 1.23951  | 0.32716  | 1.77872  |
| 12           | C              | 2.19421  | -0.09742 | -2.01609 |
| 13           | H              | 0.33668  | -1.05524 | -1.56038 |
| 14           | H              | 0.13879  | 0.48697  | -2.39372 |
| 15           | C              | 3.00369  | -0.85726 | -0.96856 |
| 16           | H              | 3.31652  | -0.84062 | 1.1755   |
| 17           | H              | 3.27513  | 0.75012  | 0.44056  |
| 18           | H              | 2.27782  | -0.58332 | -2.99342 |
| 19           | H              | 2.5996   | 0.9143   | -2.13629 |
| 20           | H              | 4.06552  | -0.8645  | -1.2344  |
| 21           | H              | 2.67382  | -1.90411 | -0.94952 |
| 22           | C              | -0.03754 | 3.10845  | 1.82059  |
| 23           | H              | 0.89308  | 3.65516  | 1.99213  |
| 24           | H              | -0.84745 | 3.68526  | 2.26697  |
| 25           | H              | 0.03409  | 2.14612  | 2.33197  |
| 26           | C              | -0.41801 | 4.3149   | -0.32041 |
| 27           | H              | -1.30273 | 4.82285  | 0.06955  |
| 28           | H              | 0.45289  | 4.9237   | -0.06451 |
| 29           | H              | -0.47946 | 4.26892  | -1.40625 |
| 30           | N              | -1.38957 | 1.99523  | 0.05544  |
| 31           | C              | -2.74421 | 2.47237  | -0.18003 |
| 32           | C              | -3.65489 | 2.6518   | 0.8793   |
| 33           | C              | -3.09232 | 2.76703  | -1.51976 |
| 34           | C              | -4.93115 | 3.11782  | 0.56427  |
| 35           | C              | -4.38622 | 3.2196   | -1.76709 |
| 36           | C              | -5.29984 | 3.39527  | -0.7407  |

|    |   |          |          |          |
|----|---|----------|----------|----------|
| 37 | H | -5.65074 | 3.25689  | 1.36339  |
| 38 | H | -4.68239 | 3.43698  | -2.78706 |
| 39 | H | -6.30179 | 3.75009  | -0.9592  |
| 40 | C | -3.35554 | 2.33349  | 2.33468  |
| 41 | C | -4.32221 | 1.27258  | 2.87788  |
| 42 | C | -3.42405 | 3.59281  | 3.20812  |
| 43 | H | -2.34454 | 1.92785  | 2.39846  |
| 44 | H | -4.34316 | 0.38096  | 2.24627  |
| 45 | H | -4.02448 | 0.97011  | 3.88614  |
| 46 | H | -5.34275 | 1.66109  | 2.9379   |
| 47 | H | -2.77979 | 4.39252  | 2.83396  |
| 48 | H | -4.445   | 3.98387  | 3.24832  |
| 49 | H | -3.11774 | 3.35966  | 4.23217  |
| 50 | C | -2.15817 | 2.59406  | -2.71336 |
| 51 | C | -2.09327 | 3.86072  | -3.57818 |
| 52 | C | -2.56941 | 1.40225  | -3.58743 |
| 53 | H | -1.1514  | 2.39459  | -2.3449  |
| 54 | H | -1.8884  | 4.75694  | -2.98776 |
| 55 | H | -1.30162 | 3.7571   | -4.32594 |
| 56 | H | -3.03043 | 4.02435  | -4.11736 |
| 57 | H | -2.51446 | 0.45478  | -3.04743 |
| 58 | H | -3.59158 | 1.52088  | -3.95933 |
| 59 | H | -1.90522 | 1.32867  | -4.45389 |
| 60 | B | -2.06935 | -0.45755 | -0.08844 |
| 61 | C | -1.87014 | -2.26534 | 1.72566  |
| 62 | C | -2.30002 | -2.94174 | -0.71565 |
| 63 | C | -0.86408 | -3.41974 | 1.85975  |
| 64 | C | -1.25937 | -4.06369 | -0.52863 |
| 65 | C | -1.14825 | -4.57175 | 0.90331  |
| 66 | H | -0.87383 | -3.77053 | 2.89721  |
| 67 | H | 0.14193  | -3.03115 | 1.66473  |
| 68 | H | -1.51726 | -4.88433 | -1.20657 |
| 69 | H | -0.28387 | -3.67812 | -0.8497  |
| 70 | H | -0.34606 | -5.31375 | 0.96892  |
| 71 | H | -2.06676 | -5.09164 | 1.19484  |
| 72 | N | -1.97639 | -1.8573  | 0.28146  |
| 73 | C | -3.23835 | -2.67628 | 2.31224  |
| 74 | H | -4.0121  | -1.95535 | 2.03615  |
| 75 | H | -3.56997 | -3.66561 | 2.00659  |

|    |   |          |          |          |
|----|---|----------|----------|----------|
| 76 | H | -3.16683 | -2.68649 | 3.4036   |
| 77 | C | -1.40183 | -1.09275 | 2.58736  |
| 78 | H | -1.27914 | -1.44408 | 3.61515  |
| 79 | H | -0.44762 | -0.68766 | 2.26885  |
| 80 | H | -2.1417  | -0.29065 | 2.60572  |
| 81 | C | -2.15076 | -2.41876 | -2.15099 |
| 82 | H | -1.20923 | -1.89283 | -2.3043  |
| 83 | H | -2.16752 | -3.27383 | -2.83188 |
| 84 | H | -2.97191 | -1.76397 | -2.45116 |
| 85 | C | -3.72996 | -3.51511 | -0.61835 |
| 86 | H | -3.95756 | -4.04817 | -1.54581 |
| 87 | H | -3.86253 | -4.2259  | 0.19443  |
| 88 | H | -4.47578 | -2.72548 | -0.50365 |
| 89 | C | -3.4667  | -0.11224 | -0.57385 |
| 90 | O | -4.55405 | -0.10525 | -0.9551  |

## 8. Reference

- 1 Melaimi, M., Jazzar, R., Soleilhavoup, M. & Bertrand, G. Cyclic (Alkyl)(amino)carbenes (CAACs): Recent Developments. *Angewandte Chemie International Edition* **56**, 10046-10068, doi:<https://doi.org/10.1002/anie.201702148> (2017).
- 2 Nöth, H. & Weber, S. Beiträge zur Chemie des Bors, 137 [1]. Über eine einfache Synthese eines Amino-imino-borans und seiner Addukte mit Bortrichlorid und Bortribromid / Contribution to the Chemistry of Boron, 137 [1]. A Convenient Synthesis of an Amino-Imino-Borane and its Adducts with Boron Trichloride and Boron Tribromide. *Zeitschrift für Naturforschung B* **38**, 1460-1465, doi:doi:10.1515/znb-1983-1123 (1983).
- 3 Romanato, P., Duttwyler, S., Linden, A., Baldrige, K. K. & Siegel, J. S. Intramolecular Halogen Stabilization of Silylium Ions Directs Gearing Dynamics. *Journal of the American Chemical Society* **132**, 7828-7829, doi:10.1021/ja9109665 (2010).
- 4 Stoll, S. & Schweiger, A. EasySpin, a comprehensive software package for spectral simulation and analysis in EPR. *Journal of Magnetic Resonance* **178**, 42-55, doi:<https://doi.org/10.1016/j.jmr.2005.08.013> (2006).
- 5 Frisch, M. J. *et al.* Gaussian 16 Rev. C.01. (2016).
- 6 Dennington, R., Keith, T. A. & Millam, J. M. GaussView, Version 6. (2016).
- 7 Yan, L., Lu, Y. & Li, X. A density functional theory protocol for the calculation of redox potentials of copper complexes. *Physical Chemistry Chemical Physics* **18**, 5529-5536, doi:10.1039/C5CP06638G (2016).
- 8 Kelly, C. P., Cramer, C. J. & Truhlar, D. G. Aqueous Solvation Free Energies of Ions and Ion-Water Clusters Based on an Accurate Value for the Absolute Aqueous Solvation Free Energy of the Proton. *The Journal of Physical Chemistry B* **110**, 16066-16081, doi:10.1021/jp063552y (2006).
